# Hebbian Learning in a Random Network Captures Selectivity Properties of Prefrontal Cortex

Grace W. Lindsay<sup>a,e</sup>, Mattia Rigotti<sup>a,b</sup>, Melissa R. Warden<sup>c,d</sup>, Earl K. Miller<sup>d</sup>,  
Stefano Fusi<sup>a,e,f,g</sup>

<sup>a</sup> *Center for Theoretical Neuroscience, College of Physicians and Surgeons, Columbia University, New York, New York, USA*

<sup>b</sup> *IBM T.J. Watson Research Center, 1101 Kitchawan Rd., Yorktown Heights, NY, USA*

<sup>c</sup> *Neurobiology and Behavior, College of Agriculture and Life Sciences, Cornell University, Ithaca, NY, USA*

<sup>d</sup> *The Picower Institute for Learning and Memory & Department of Brain and Cognitive Sciences, Massachusetts Institute of Technology, USA*

<sup>e</sup> *Mortimer B. Zuckerman Mind Brain Behavior Institute, College of Physicians and Surgeons, Columbia University, New York, New York, USA*

<sup>f</sup> *Kavli Institute for Brain Sciences, Columbia University, New York, New York, USA*

<sup>g</sup> *Corresponding Author: sf2237@columbia.edu*

---

## Abstract

Complex cognitive behaviors, such as context-switching and rule-following, are thought to be supported by prefrontal cortex (PFC). Neural activity in PFC must thus be specialized to specific tasks while retaining flexibility. Nonlinear 'mixed' selectivity is an important neurophysiological trait for enabling complex and context-dependent behaviors. Here we investigate (1) the extent to which PFC exhibits computationally-relevant properties such as mixed selectivity and (2) how such properties could arise via circuit mechanisms. We show that PFC cells recorded from male and female rhesus macaques during a complex task show a moderate level of specialization and structure that is not replicated by a model wherein cells receive random feedforward inputs. While random connectivity can be effective at generating mixed selectivity, the data shows significantly more mixed selectivity than predicted by a model with otherwise matched parameters. A simple Hebbian learning rule applied to the random connectivity, however, increases mixed selectivity and allows the model to match the data more accurately. To explain how learning achieves this, we provide analysis along with a clear geometric interpretation of the impact of learning on selectivity. After learning, the model also matches the data on measures of noise, response density, clustering, and the distribution of selectivities. Of two styles of Hebbian learning tested, the simpler and more biologically plausible option better matches the data. These modeling results give intuition about how neural properties important for cognition can arise in a circuit and make clear experimental predictions regarding how various measures of selectivity would evolve during animal training.

---

**Significance Statement:** Prefrontal cortex (PFC) is a brain region believed to support the ability of animals to engage in complex behavior. How neurons in this area respond to stimuli—and in particular, to combinations of stimuli ("mixed selectivity")—is a topic of interest. Despite the fact that models with random feedforward connectivity are capable of creating computationally-relevant mixed selectivity, such a model does not match the levels of mixed selectivity seen in the data analyzed

in this study. Adding simple Hebbian learning to the model increases mixed selectivity to the correct level and makes the model match the data on several other relevant measures. This study thus offers predictions on how mixed selectivity and other properties evolve with training.

## 1. Introduction

1 The ability to execute complex, context-dependent behavior is evolutionarily valu-  
2 able and ethologically observed (Rendall et al., 1999; Kalin et al., 1991). How the  
3 brain carries out complex behaviors is thus the topic of many neuroscientific studies.  
4 A region of focus is the prefrontal cortex (PFC), (Botvinick, 2008; Waskom et al., 2014;  
5 Miller and Cohen, 2001; Duncan, 2001), as lesion (Szczepanski and Knight, 2014) and  
6 imaging (Miller and D’Esposito, 2005; Bugatus et al., 2017) studies have implied its  
7 role in complex cognitive tasks. As a result, several theories have been put forth to ex-  
8 plain how PFC can support complexity on the computational and neural levels (Miller  
9 and Cohen, 2001; Wood and Grafman, 2003; Fusi et al., 2016).

10 Observing the selectivity profiles of its constituent cells is a common way to inves-  
11 tigate a neural population’s role in a computation. In its simplest form, this involves  
12 modeling a neuron’s firing rate as a function of a single stimulus, or, perhaps, an ad-  
13 ditive function of multiple stimuli (Sahani and Linden, 2003; Duhamel et al., 1998;  
14 Moser et al., 2008). More recently, however, the role of neurons that combine inputs  
15 in a nonlinear way has been investigated (Rigotti et al., 2013; Mante et al., 2013;  
16 Stokes et al., 2013; Pagan et al., 2013; Meister et al., 2013; Raposo et al., 2014; Fusi  
17 et al., 2016), often in PFC. Rather than responding only to changes in one input, or  
18 to changes in multiple inputs in a linear way, neurons with nonlinear mixed selectivity  
19 have firing rate responses that are a nonlinear function of two or more inputs (Figure  
20 1B). Cells with this selectivity (which we call simply ”mixed”) are important for pop-  
21 ulation coding because of their effect on the dimensionality of the representation: they  
22 increase the dimensionality of the population response, which increases the number of  
23 patterns that a linear classifier can read out. This means that arbitrary combinations  
24 of inputs can be mapped to arbitrary outputs. In relation to complex behaviors, mixed  
25 selectivity allows for a change in context, for example, to lead to different behavioral  
26 outputs, even if stimulus inputs are the same. For more on the benefits of mixed  
27 selectivity, see Fusi et al. (2016).

28 Theoretical work on how these properties can arise on a circuit level shows that  
29 random connectivity is surprisingly efficient at increasing the dimensionality of the  
30 neural representation (Jaeger and Haas, 2004; Maass et al., 2002; Buonomano and  
31 Maass, 2009; Rigotti et al., 2010; Barak et al., 2013; Babadi and Sompolinsky, 2014;  
32 Litwin-Kumar et al., 2017). This means that mixed selectivity can be observed even  
33 without learning. However, learning can greatly improve the ability of a linear readout  
34 to generalize and hence to make the readout response more robust to noise and varia-  
35 tions in the sensory inputs (see e.g. Fusi et al. (2016)). The ideal situation would be  
36 one in which a neural population represents only the task relevant variables and the  
37 representation has the maximal dimensionality. In brain areas like PFC, where there  
38 is a huge convergence of inputs from many other brain areas, it might be important  
39 to bias the mixed selectivity representations toward the task relevant variables, which  
40 can be achieved only with learning.

41 In this study, we characterize the response of a population of PFC cells in terms of

42 the distribution of linear and nonlinear selectivity, the response density, and the clus-  
43 tering of selectivities. All these properties characterize the dimensionality of neural  
44 representations and are important for the readout performance. As described above,  
45 nonlinear mixed selectivity is important for increasing dimensionality. High dimension-  
46 ality, however, also requires a diversity of responses. We studied this by determining  
47 how the preference to different stimuli are distributed across the population. In some  
48 lower sensory areas, cells tend to be categorizable—that is, there are groups of cells  
49 that display similar preference profiles (Goard et al., 2016). More associative areas  
50 tend to lose this clustering of cell types. Such categories may be useful when an area is  
51 specialized for a given task, but diversity is needed for flexibility (Raposo et al., 2014).

52 After characterizing the PFC response, we show that a model with random connec-  
53 tivity can only partially explain the PFC representation. However, with a relatively  
54 small deviation from random connectivity—obtained with a simple form of Hebbian  
55 learning that is characterized by only two parameters—the model describes the data  
56 significantly better.

## 57 **2. Materials and Methods**

### 58 *2.1. Task Design*

59 The data used in this study comes from previously published work (Warden and  
60 Miller, 2010). In brief, two monkeys performed two variants of a delayed match-to-  
61 sample task (Figure 1A). In both task types, after initial fixation, two image cues  
62 (chosen from four possible) were presented in sequence for 500ms each with a 1000ms  
63 delay period in between the first and second cue. After a second delay period also  
64 lasting 1000ms, one of two events occurred, depending on the task type. In the recog-  
65 nition task, another sequence of two images was shown and the monkey was instructed  
66 to release a bar if this test sequence matched the initial sample sequence. In the recall  
67 task, an array of three images appeared on the screen, and the monkey had to saccade  
68 to the two images from the sample sequence in the correct order. Blocks of recall and  
69 recognition tasks were interleaved during each recording session. Given that each se-  
70 quence had two different image cues chosen from the four total image identity options  
71 and that there were two task types, the total number of conditions was  $4 \times 3 \times 2 =$   
72 24.

### 73 *2.2. Neural Data*

74 Recordings were made using grids with 1 mm spacing (Crist Instrument) and  
75 custom-made independently moveable microdrives to lower eight dura-puncturing Epoxy-lite-  
76 coated tungsten microelectrodes (FHC) until single neurons were isolated. Cells were  
77 recorded from two adult rhesus monkeys (*Macaca mulatta*), one female and one male,  
78 and combined for analysis. No attempt was made to pre-screen neurons, and a total  
79 of 248 neurons were recorded (with each neuron observed under both task types).

80 For the purposes of this study, firing rates for each neuron were calculated as the  
81 total number of spikes during the later 900ms of the second delay period, as it was at  
82 this point that the identities of all task variables were known. Any cells that did not  
83 have at least 10 trials for each condition or did not have a mean firing rate of at least  
84 1 spike/sec as averaged over all trials and conditions were discarded. This left 90 cells.

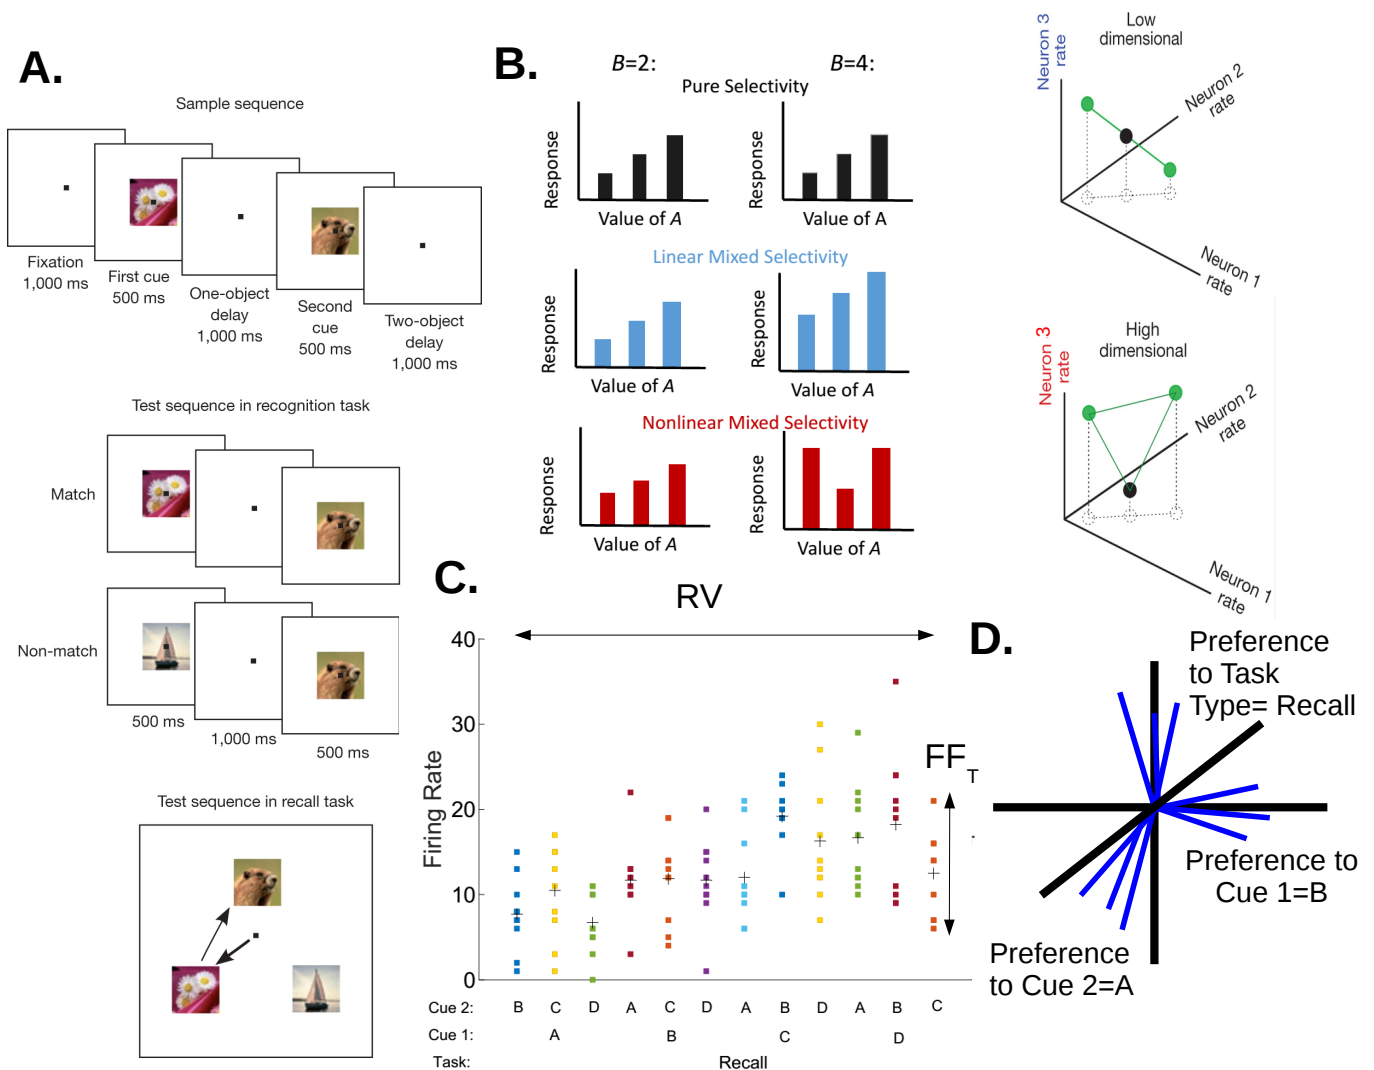

Figure 1: Description of prefrontal cortex data and relevant measures of selectivity A.) Task Design. In both task types, the animal fixated as two image cues were shown in sequence. After a delay the animal had to either indicate that a second presented sequence matched the first or not ("recognition") or saccade to the two images in correct order from a selection of three images ("recall"). B.) What nonlinear mixed selectivity can look like in neural responses and its impact on computation. The bar graphs on the left depict three different imagined neurons and their responses to combinations of two task variables A and B. The black neuron has selectivity only to A, as its responses are invariant to changes in B. The blue neuron has linear mixed selectivity to A and B: its responses to different values of A are affected by the value of B, but in a purely additive way. The red neuron has nonlinear mixed selectivity: its responses to A are impacted nonlinearly by a change in the value of B. The figures on the right show how including a cell with nonlinear mixed selectivity in a population increases the dimensionality of the representation. With the nonlinearly-selective cell (bottom), the black dot can be separated with a line from the green dots. Without it (top), it cannot. C.) A depiction of measures of trial-to-trial noise ( $FF_T$ ) and the distribution of responses across conditions (RV). The x-axis labels the condition, each dot is the firing rate for an individual trial and the crosses are condition means used for calculating RV (data from a real neuron; recognition task not shown). D.) Conceptual depiction of the clustering measure. Each cell was represented as a vector (blue) in a space wherein the axes (black) represent preference for task variable identities, as determined by the coefficients from a GLM (only three are shown here). The clustering measure determines if these vectors are uniformly distributed.

### 85 2.3. Fano Factor Measurements

86 Noise is an important variable when measuring selectivity. High noise levels re-  
87 quire stronger tuning signals in order to be useful for downstream areas, and to reach  
88 significance in statistical testing. Thus, any model attempting to match the selectivity  
89 profile of a population must be constrained to have the same level of noise. Here, we  
90 measure noise as the Fano Factor (variance divided by mean) of each cell's activity  
91 across trials for each condition (spike count taken from later 900ms of the two-object  
92 delay). This gives 24 values per cell. This is the trial Fano Factor. Averaging over  
93 conditions gives one trial Fano Factor value per cell, and averaging over cells gives a  
94 single number representing the average noise level of the network. Unless otherwise  
95 stated,  $FF_T$  refers to this network averaged measure.

96 Another measure of interest is how a neuron's response is distributed across condi-  
97 tions. Do neurons respond differentially to a small number of conditions (i.e., a sparse  
98 response), or is the distribution more flat? To measure this, the firing rate for each  
99 condition (averaged across trials) was calculated for each neuron and the Fano Factor  
100 was calculated across conditions. In this case, a large value means that some conditions  
101 elicit a very different response than others, while a small value suggests the responses  
102 across conditions are more similar. We call this value the response variability, or RV.  
103 Averaging across all cells gives the response variability of the network.

104 See Figure 1C for a visualization of these measures in an example neuron.

### 105 2.4. Selectivity Measurements

106 A neuron is selective to a task variable if its firing rate is significantly and reliably  
107 affected by the identity of that task variable. In this task, each condition contains three  
108 task variables: task type (recall or recognition), the identity of the first cue, and the  
109 identity of the second cue. Therefore, we used a 3-way ANOVA to determine if a given  
110 neuron's firing rate was significantly ( $p < .05$ ) affected by a task variable or combination  
111 of task variables. Selectivity can be of two types: pure or nonlinearly mixed (referred  
112 to as just "mixed"), based on which terms in the ANOVA are significant. If a neuron  
113 has a significant effect from one of the task variables, for example, it would have  
114 pure selectivity to that variable. Interaction terms in the ANOVA represent nonlinear  
115 effects from combinations of variables. Therefore, any neurons that have significant  
116 contributions from interaction terms as determined by the ANOVA have nonlinear  
117 mixed selectivity. As an example, if a neuron's firing rate can be described by a  
118 function that is linear in the identity of the task type, the identity of the second cue,  
119 and the identity of the combination of task type and first cue, then that neuron has  
120 pure selectivity to task type (TT), pure selectivity to cue 2 (C2) and mixed selectivity  
121 to the combination of task type and cue 1 (TTxC1). Note that having pure selectivity  
122 to two or more task variables is not the same as having nonlinear mixed selectivity to  
123 a combination of those task variables.

124 We also investigate whether the nonlinear interactions we observe indicate supra-  
125 or sublinear effects. To do this we fit a general linear model that includes 2nd-order  
126 interaction terms to each neuron's response. The signs of the coefficients for the 2nd-  
127 order terms indicate whether a certain nonlinear effect leads to a response higher  
128 (supralinear) or lower (sublinear) than expected from a purely additive relationship.

### 129 2.5. Clustering Measurement

130 Beyond the numbers of neurons selective to different task variables, an understand-  
131 ing of how preferences to task variable identities cluster can inform network models.

132 For this, we use a method that is inspired by the Projection Angle Index of Response  
133 Similarity (PAIRS) measurement as described in Raposo et al. (2014). For this measure  
134 each neuron is treated as a vector in selectivity space, where the dimensions represent  
135 preference to a given task variable identity (Figure 1D). To get these values, neuronal  
136 responses are fit with a general linear model (GLM) to find which task variable identi-  
137 ties significantly contribute to the firing rate. Note that this gives a beta coefficient for  
138 each value of each task variable, such as cue 1=B. These values dictate how the firing  
139 rate changes as task variable identities differ from the reference condition Task Type =  
140 Recognition, Cue 1 =A, and Cue 2 = B. Formally:  $FR = FR_{ref} + \beta_1[TT = Recall] +$   
141  $\beta_2[C1 = B] + \beta_3[C1 = C] + \beta_4[C1 = D] + \beta_5[C2 = A] + \beta_6[C2 = C] + \beta_7[C2 = D]$ . The  
142 beta values found for each cell via this method are shown in Figure 3C (non-significant  
143 coefficients — those with  $p > .05$  — are set to 0).

144 This analysis does not include interaction terms (second- or third-order terms).  
145 The reason for this is partly that, given the relatively low number of trials, the high  
146 dimensional full GLM model would be difficult to confidently fit. In addition, analysis  
147 of clustering in a high-dimensional space ( the full model would yield a 45-dimensional  
148 space) with a relatively small number of neurons would be difficult to interpret. There-  
149 fore, we look only at how the cells cluster according to their preference of the identities  
150 associated with the pure terms.

151 The coefficients derived from the GLM define a vector in a 7-D vector space for  
152 each neuron (see Figure 1D for a schematic). The clustering method compares the  
153 distribution of vectors generated by the data (each normalized to be unit length)  
154 to a uniform distribution on the unit hypersphere in order to determine if certain  
155 combinations of preferences are more common than expected by chance.

156 In PAIRS (Raposo et al., 2014), this comparison is done by first computing the  
157 average angle between a given vector and its  $k$  nearest neighbors and seeing if the  
158 distribution of those values differs between the data and a random population . That  
159 approach is less reliable in higher dimensions, therefore we use the Bingham test  
160 instead of PAIRS (Mardia and Jupp, 2000). The Bingham test calculates the test  
161 statistic  $S = \frac{p(p+2)}{2}n(Tr(\mathbf{T}^2) - \frac{1}{p})$ . This statistic, which we refer to as the clustering  
162 value, measures the extent to which the scatter matrix,  $\mathbf{T}$ , (an approximation of the  
163 covariance matrix) differs from the identity matrix (scaled by  $1/p$ ), where  $p$  and  $n$  are  
164 the dimensions of the selectivity space (7) and the number of cells (90), respectively.  
165 The higher this value is, the more the data deviates from a random population of  
166 vectors wherein selectivity values are IID. Thus, a high value suggests that neurons in  
167 the population cluster according to task variable identity preferences. In order to put  
168 this clustering value into context we compared the value found from the data to two  
169 distributions: one generated by shuffled data and one generated from data designed to  
170 be highly clustered. For the shuffled data, we created "fake" cell vectors by shuffling  
171 the selectivity values across all cells. For the clustered data, we created 3 categories  
172 of fake cells, each defined by pure selectivity to two specific task variable identities.  
173 A population of 90 cells was created by combining 30 cells from each category (the  
174 population was also designed to have the same average firing rate and  $FF_T$  of the data).  
175 This results in a population that has 3 clear clusters of cell types in selectivity space.  
176 100 populations based on each type of fake data were created in order to generate  
177 distributions that represent random and clustered data.

178 Using the Gine-Ajne test of uniformity on the hypersphere (Giné, 1975) gives very  
179 similar results to the Bingham test results.

## 180 2.6. Circuit Model

181 To explore the circuit mechanisms behind PFC selectivity, we built a simple two-  
182 layer neural model, modeled off of previous work (Barak et al., 2013) (see Figure 5A  
183 for a diagram). The first layer consists of populations of binary neurons, with each  
184 population representing a task variable identity. To replicate a given condition, the  
185 populations associated with the task variable identities of that condition are turned on  
186 (set to 1) and all other populations are off (set to 0). Each population has a baseline  
187 of 50 neurons. To capture the biases in selectivities found in this dataset (particularly  
188 the fact that, in the 900ms period we used for this analysis, many more cells show  
189 selectivity to task type than cue 2 and to cue 2 than cue 1), the number of neurons in  
190 the task type and cue 2 populations are scaled by factors that reflect these biases (80  
191 cells in each task type population and 60 in each cue 2 population). The exact values  
192 of these weightings do not have a significant impact on properties of interest in the  
193 model.

194 The second layer represents PFC cells. These cells get weighted input from a subset  
195 of the first layer cells. Cells from the input layer to the PFC layer are connected with  
196 probability .25 (unless otherwise stated), and weights for the existing connections are  
197 drawn from a Gaussian distribution ( $\mu_W = .207$ , and  $\sigma_W = \mu_W$  unless otherwise  
198 stated. Because negative weights are set to 0, the actual connection probability and  
199  $\sigma_W$  may be slightly lower than given).

200 The activity of a PFC cell on each trial,  $t$ , is a sigmoidal function of the sum of its  
201 inputs:

$$r_i^t = k \phi \left( \sum_j w_{ij} x_j^t + \epsilon_A^t - \Theta_i \right) \quad (1)$$
$$\phi(z) = \frac{1}{1 + e^{-z}}$$

$$\epsilon_A^t \sim \mathcal{N}(0, \sigma_A^2) \quad \sigma_A = a\mu_W,$$

202 where  $x_j$  is the activity (0 or 1) of the  $j^{\text{th}}$  input neuron and  $w_{ij}$  is the weight from the  
203  $j^{\text{th}}$  input neuron to the  $i^{\text{th}}$  output neuron.  $\Theta_i$  is the threshold for the  $i^{\text{th}}$  output neuron,  
204 which is calculated as a percentage of the total weight it receives:  $\Theta_i = \lambda \sum_j w_{ij}$ . The  
205  $\lambda$  value is constant across all cells, making  $\Theta$  cell-dependent.  $k$  scales the responses so  
206 that the average model firing rate matches that of the data.

207 Two sources of noise are used to model trial-to-trial variability.  $\epsilon_A$  is an additive  
208 synaptic noise term drawn independently on each trial for each cell from a Gaussian  
209 distribution with mean zero. The standard deviation for this distribution is controlled  
210 by the parameter  $a$ , which defines  $\sigma_A$  in units of the mean of the weight distribution,  
211  $\mu_W$ . The second noise source is multiplicative and depends on the activity of a given  
212 cell on each trial:

$$y_i^t \sim \mathcal{N}(r_i^t, \sigma_{M_i}^t) \quad (2)$$

$$\sigma_{M_i}^t = m r_i^t$$

213 Thus, the final activity of an output PFC cell on each trial,  $y_i^t$ , is drawn from a  
214 Gaussian with a standard deviation that is a function of  $r_i^t$ . This standard deviation is  
215 controlled by the parameter  $m$ . Both  $m$  and  $a$  are fit to make the model  $FF_T$  match  
216 that of the data.

217 To make the model as comparable to the data as possible, ten trials are run for  
218 each condition and 90 model PFC cells are used for inclusion in the analysis.

### 219 2.7. Hebbian Learning

220 A simplified version of Hebbian learning is implemented in the network in a manner  
221 that captures the "rich get richer" nature of Hebbian learning while keeping the overall  
222 input to an individual cell constant. In traditional Hebbian learning, weight updates  
223 are a function of the activity levels of the pre- and post-synaptic neurons:  $\Delta w_{ij} =$   
224  $g(x_j, y_i)$ . In this simplified model we use connection strength as a proxy for joint  
225 activity levels:  $\Delta w_{ij} = g(w_{ij})$ . We also implement a weight normalization procedure  
226 so that the total input weight to a cell remains constant as weights change.

227 To do this, we first calculate the total amount of input each output cell,  $i$ , receives  
228 from each input population,  $p$ :

$$I_i^p = \sum_{j \in p} w_{ij} \quad (3)$$

229 The input populations (each corresponding to one task variable identity) are then  
230 ranked according to this value. The top  $N_L$  populations according to this ranking (that  
231 is, those with the strongest total weights onto the output cell) have the weights from  
232 their constituent cells increased according to:

$$w_{ij} = (1 + \eta)w_{ij}, \quad j \in P_{1:N_L}, \quad (4)$$

233 where  $\eta$  is the learning rate (set to .2 unless otherwise stated). This amounts to  
234 a multiplicative scaling of synaptic weights, which is compatible with experimental  
235 observations (Loewenstein et al., 2011; Turrigiano et al., 1998). After this, all weights  
236 into the cell are normalized via:

$$\mathbf{w}_i = \mathbf{w}_i \frac{\sum_{p=1}^P I_i^p}{\sum_{j=1}^J w_{ij}} \quad (5)$$

237 Note, the numerator in the second term is the sum of all weights into the cell before  
238 Eqn. 4 is applied and the denominator is the sum after it is applied. As learning pro-  
239 gresses according to this rule, weights from cells that aren't in the top  $N_L$  populations  
240 trend to zero. At that point, each learning step increases the weights of all remaining  
241 connections by  $\eta$  and normalizes them all by the same amount, resulting in no further  
242 changes in the weight matrix.

243 In this work, two versions of Hebbian learning are tested. In the unrestricted, or  
244 "free", learning condition described above, the top  $N_L$  populations are chosen freely  
245 from all input populations (equivalently, all task variable identities) based solely on  
246 the total input coming from each population after the random weights are assigned.  
247 The alternative, "constrained" learning, is largely the same, but with a constraint  
248 on how these top  $N_L$  populations are chosen: all task variables must be represented  
249 before any can be repeated. So, two populations representing different identities of



250 the same task variable (e.g., cue 1 A and cue 1 B) will not both be included in the  
251  $N_L$  populations unless both other task variables already have a population included  
252 (which would require that  $N_L > 3$ ). So, with  $N_L = 3$ , exactly one population from  
253 each task variable (task type, cue 1, cue 2) will have weights increased. This variant  
254 of the learning procedure was designed to ensure that inputs could be mixed from  
255 different task variables, to increase the likelihood that mixed selectivity would arise.  
256 Both forms of learning are demonstrated for an example cell in Figure 5B.

257 In both forms of learning, the combination of weight updating and normalization  
258 is applied to each cell once per learning step.

### 259 *2.8. Classification Performance*

260 The measures of selectivity we have looked at in the data are important for the  
261 ability of a population to represent task information in a way that can be readily  
262 readout. We also test directly the ability to readout task information from our model  
263 populations using linear discriminant analysis (LDA). We generate 20 trials per condi-  
264 tion from the model and use 10 to train the classifiers and 10 to test. Three separate  
265 classifiers are trained to read out each of the three linear terms: task type identity, cue  
266 1 identity, and cue 2 identity. The average performance across these three tasks gives  
267 the "linear" performance. An additional four classifiers were trained to read out each  
268 of the joint identities of task type-cue 1, task-type 2, cue 1-cue 2, and task type-cue  
269 1-cue 2. The average performance across these four tasks is called the "higher order"  
270 performance.

271 We also conduct an explicit test of the model's ability to perform a non-linearly  
272 separable task. For this, all combinations of identities for cue 1 and cue 2 are generated  
273 as inputs to the network, and the classification task is to determine if the identities  
274 are the same or different (the task type input is held constant). Fifty trials are used  
275 for training (using LDA) and fifty for testing. We also measure the ability of the  
276 input population to perform this task (by using the binary input population activity  
277 directly), in which case additive noise is used to generate multiple trials, and the mean  
278 firing rate and  $FF_T$  are fit to match that of the data.

### 279 *2.9. Toy Model Calculations*

280 To make calculations and visualizations of the impacts of learning easier, we use a  
281 further simplified toy model (see Figure 8A (left) for a schematic). Instead of a sig-  
282 moidal nonlinearity, the heaviside function is used. The toy model has two task vari-  
283 ables (T1 and T2) and each task variable has two possible identities (A or B). Four ran-  
284 dom weights connect these input populations to the output cell:  $W_{1A}$ ,  $W_{1B}$ ,  $W_{2A}$ ,  $W_{2B}$ .  
285 On each condition, exactly one task variable identity from each task variable is active  
286 (set to 1). This gives four possible conditions, each of which is plotted as a point in the  
287 input space in Figure 2. The threshold is denoted by the dotted lines. If the weighted  
288 sum of the inputs on a given condition is above the threshold, the cell is active (green),  
289 otherwise it is not.

290 The toy model follows the same learning rules defined for the full model. Examples  
291 of the impacts of learning on the representation of the 4 conditions are seen in Figure  
292 2A and B.

293 A cell's selectivity is more robust to additive noise (which functions like a shift in  
294 threshold) if there is a large range of threshold values for which its selectivity doesn't  
295 change. To explore noise robustness in this model, we will define:

$$\Delta_x \equiv W_{1B} - W_{1A} \quad \Delta_y \equiv W_{2B} - W_{2A} \quad \alpha \equiv \Delta_y / \Delta_x \geq 1 \quad (6)$$

296 Thus,  $\alpha$  is the ratio of the side lengths of the rectangle formed by the four conditions  
 297 (see Figure 2C, top). Without loss of generality, we define the larger of the two sides  
 298 as associated with T2,  $W_{2B} > W_{2A}$ , and  $W_{1B} > W_{1A}$ .

299 For the cell to display pure selectivity to T2, the following inequality must hold:

$$W_{1B} + W_{2A} \leq \Theta < W_{1A} + W_{2B} \quad (7)$$

300 Therefore the range of thresholds that give rise to pure selectivity is:

$$\begin{aligned} (W_{1A} + W_{2B}) - (W_{1B} + W_{2A}) &= (W_{2B} - W_{2A}) + (W_{1A} - W_{1B}) \\ &= \Delta_y - \Delta_x = \Delta_x(\alpha - 1) \end{aligned} \quad (8)$$

301 The analogous calculations for mixed selectivity (assuming the T1B-T2B condition is  
 302 active only, but results are identical for T1A-T2A being the only inactive condition)  
 303 are:

$$\begin{aligned} W_{1A} + W_{2B} \leq \Theta < W_{1B} + W_{2A} \\ W_{1B} + W_{2B} - (W_{1A} + W_{2A}) &= (W_{1B} - W_{1A}) = \Delta_x \end{aligned} \quad (9)$$

304 Thus, pure selectivity is more noise robust than mixed selectivity when  $\alpha > 2$ . This  
 305 imbalance can be seen in Figure 2C.

306 Now we show that, given weights drawn at random from a Gaussian distribution,  
 307  $\alpha > 2$  is more common than  $\alpha < 2$ . The argument goes as follows: because  $\Delta_x$   
 308 and  $\Delta_y$  are differences of normally distributed variables, they are themselves normally  
 309 distributed (with  $\mu = 0$ ,  $\sigma = 2\sigma_w$ ). The ratio of these differences is thus given  
 310 by a Cauchy distribution. However, because  $\alpha$  represents a ratio of lengths, we are  
 311 only interested in the magnitude of this ratio, which follows a standard half-Cauchy  
 312 distribution. Furthermore,  $\alpha$  is defined such that the larger difference should always  
 313 be in the numerator. Thus,

$$P(\alpha > 2) = 1 - \int_{1/2}^2 \frac{2}{\pi(1+u^2)} = .5903. \quad (10)$$

314 Therefore, the majority of cells can be expected to have  $\alpha > 2$  with random weights  
 315 and thus higher noise robustness for pure selectivity than for mixed.

316 This comparison of noise robustness, however, assumes the threshold is placed at  
 317 the most noise robust location for each type of selectivity. Here, the threshold is  
 318 defined as a fraction of the total weight going into the cell:  $\Theta = \lambda \Sigma W$ . As we increase  
 319  $\lambda$  then, the threshold is a line with slope of -1 that moves from the bottom left corner  
 320 up to the top right. Examples of how this impacts selectivity are shown in Figure 2D.

321 To investigate how noise robustness changes with  $\lambda$ , we generate a large (10000)  
 322 population of cells, each with four random input weights drawn from a Gaussian with  
 323 positive mean and constrained to be non-negative (qualitative results hold for many  
 324 weight/variance pairs), and calculate the size of the additive noise shift needed to  
 325 cause each cell to lose its selectivity (whichever it has).

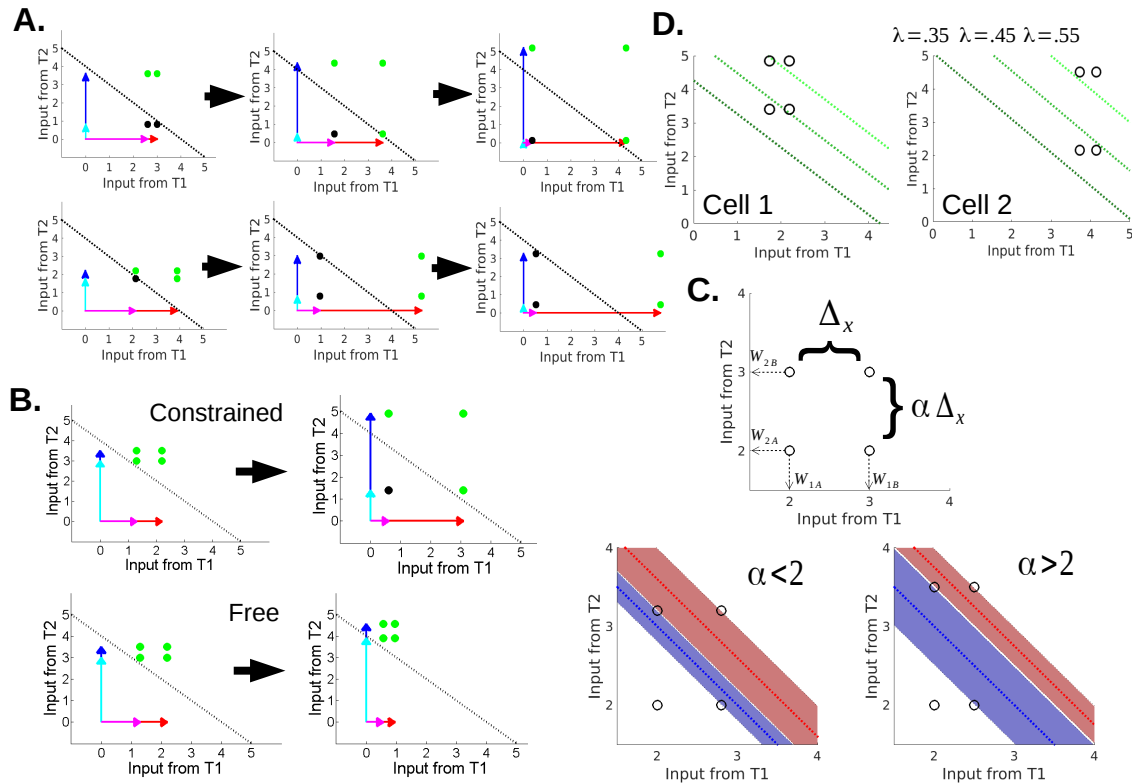

Figure 2: Signal and noise representation for the toy model shown in Figure 8A. Strength of weights from the 4 input populations are given as arrows in (A and B) and the threshold for the heaviside function is shown as a dotted line. The cell is active for conditions above the threshold (green). Weight arrows omitted for visibility in (C and D). A.) Learning causes the representation of conditions to change. This can change selectivity in multiple ways. Shown here: pure selectivity turns into mixed selectivity (top) and mixed selectivity turns into pure (bottom). B.) Constrained and free learning can lead to different signal changes. Constrained learning (top) guarantees that one population from each task variable is increased. This ensures that the representation spreads out. In this case, the cell goes from no selectivity to mixed selectivity. With these starting weights, free learning increases both populations from T2, and the cell does not gain selectivity. C.) Noise robustness can be thought of as the range of thresholds that can sustain a particular type of selectivity. Relative noise robustness of mixed and pure selectivity depends on the shape of the representation.  $\alpha$  is the ratio of the differences between the weights from each task variable (top). In the two figures on the bottom, blue (red) dotted lines show optimal threshold for pure (mixed) selectivity and shaded areas show the range of thresholds created by trialwise additive noise that can exist without altering the selectivity. When  $\alpha < 2$ , mixed selectivity is robust to larger noise ranges (bottom left). When  $\alpha > 2$ , pure selectivity is more robust (bottom right). Given normally-distributed weights,  $\alpha > 2$  is more common. D.) Two example cells showing how selectivity changes with changing  $\lambda$ . Sets of weights for both cells are drawn from the same distribution. The resulting thresholds at 3 different  $\lambda$  values (labeled on the right cell but identical for each) are shown for each cell. With the smallest  $\lambda$ , neither example cell has selectivity. With the middle  $\lambda$  value Cell 1 gains mixed. Cell 2 gains pure selectivity, which it retains at the higher  $\lambda$ , while Cell 1 switches to the other type of mixed

326 Assuming a fixed threshold, we then explore how noise robustness varies with  
327 learning. In the case of constrained learning with  $N_L = 2$ ,  $\Delta_x$  and  $\Delta_y$  both increase.  
328 According to Eqn. 7 and Eqn. 9, robustness to both selectivities increases with  $\Delta_x$ .  
329 The relative increase in robustness will depend on how  $\alpha$  changes. It can be shown  
330 that if  $\frac{W_{1B}}{W_{1A}} < \frac{W_{2B}}{W_{2A}}$  then  $\Delta_x$  will expand more than  $\Delta_y$  and  $\alpha$  will decrease, meaning the  
331 increase in noise robustness favors mixed selectivity. If  $\frac{W_{1B}}{W_{1A}} > \frac{W_{2B}}{W_{2A}}$ , then  $\alpha$  will grow,  
332 and the increase in noise robustness will be larger for pure than mixed. However, this  
333 condition is less common.

334 When  $N_L = 1$ , learning ultimately leads to a larger ratio between the side lengths.  
335 This is straightforward for  $W_{2B} > W_{1B}$  ( $\Delta_y$  grows and  $\Delta_x$  shrinks). However, if  
336  $W_{1B} > W_{2B}$ ,  $\alpha$  will first decrease as  $\Delta_x$  grows and  $\Delta_y$  shrinks. This is good for mixed  
337 noise robustness. The ratio then flips ( $\Delta_x > \Delta_y$ ), and  $\Delta_y$  (the side that is now shorter)  
338 is still shrinking and  $\Delta_x$  is growing. In this circumstance, if  $\Delta_y/\Delta_x$  becomes less than  
339  $\frac{1}{2}$ , the representation will favor pure noise robustness over mixed. This flipping of  $\alpha$   
340 is possible for some cells when  $N_L = 2$  if  $\frac{W_{1B}}{W_{1A}} < \frac{W_{2B}}{W_{2A}}$ , but the weights would likely  
341 plateau before  $\alpha$  became less than  $\frac{1}{2}$ , and so the drop in mixed selectivity does not  
342 occur.

343 In free learning with  $N_L = 2$ , cells that have  $W_{1A} > W_{2B}$ , will see both weights  
344 from T1 increase and (due to the weight normalization) both weights from T2 decrease.  
345 Because the weights change in proportion to their value,  $\Delta_x$  increases,  $\Delta_y$  decreases  
346 and so  $\alpha$  goes down. This leads to more noise robustness for mixed and less for pure.  
347 If  $W_{2A} > W_{1B}$ , these trends are reversed and the cell has more noise robustness for  
348 pure and less for mixed.

### 349 *2.10. Experimental Design and Statistical Analysis*

350 As described in the Selectivity Measurements subsection above, the main statistical  
351 test used in this work was a 3-way ANOVA (within-subjects, with a total 23 degrees  
352 of freedom). Each of the 90 cells used had 10 trials from each condition. As part of  
353 calculating the clustering value (see Clustering Measurement subsections above), we  
354 calculated the p-value for the F statistic of the hypothesis test that each coefficient in  
355 our General Linear Model was equal to 0. All analyses were performed in MATLAB.

## 356 **3. Results**

357 In this study, we analyzed various measures of selectivity of a population of PFC  
358 cells recorded as an animal carried out a complex delayed match-to-sample task.  
359 Through this process, several properties of the representation in PFC were discov-  
360 ered and a simple circuit model that included Hebbian learning was able to replicate  
361 them. These properties, combined with the modeling results, provide support for the  
362 notion that PFC selectivities are the result of Hebbian learning in a random network.

### 363 *3.1. PFC Population is Moderately Specialized and Selective*

364 The average firing rate of cells in this population was  $4.9 \pm 5.1$  spikes/sec. Fano  
365 Factor analyses provided measurements of the noise and density of response in the  
366 data (Figure 3B). The average value of the across-trial Fano Factor ( $FF_T = 2.8 \pm 1.7$   
367 spikes/sec), shows that the data has elevated levels of noise compared to a Poisson  
368 assumption. Looking at response variability (RV)—a measure of how a cell’s response  
369 is distributed across conditions—suggests that PFC cells are responding densely across

370 the 24 conditions ( $RV = 1.1 \pm 1.1$  spikes/sec, for comparison, at the observed average  
371 firing rates, a cell that responded only to a single condition would have  $RV \approx 120$ , one  
372 that responded to two conditions would have  $RV \approx 57$ ). This finding suggests that  
373 these cells are not responding sparsely and are not very specialized for the individual  
374 conditions of this task.

375 Each condition is defined by a unique combination of 3 task variables: task type,  
376 identity of image cue 1 and identity of image cue 2 (Figure 1A). Selectivity to task  
377 variables was determined via a 3-way ANOVA. The results of this analysis are shown  
378 in Figure 3A. This figure shows the percentage of cells with selectivity to each task  
379 variable and combination of task variables (as determined by a significant ( $p < .05$ )  
380 term in the ANOVA). A cell that has selectivity to any of the regular task variables  
381 (task type, cue 1, cue 2) has pure selectivity, while a cell that has selectivity to any  
382 of the interaction terms (combination of task variables such as task type x cue 1, task  
383 type x cue 2, etc) has nonlinear mixed selectivity. The final two bars in Figure 3A  
384 show the number of cells with pure and mixed selectivity defined this way. Note that  
385 a cell can have both pure and mixed selectivity, thus the two values sum to more than  
386 100%.

387 The majority of cells (77/90) showed pure selectivity to at least one task variable.  
388 But the population shows clear biases in the distribution of these pure selectivities:  
389 task type selectivity is the most common (59 cells) and cue 2 is represented more than  
390 cue 1 (48 vs. 30 cells) (these biases are observable in the GLM fits as well, see Figure  
391 3C). This latter effect may be due to the time at which these rates were collected: these  
392 rates were taken during the second delay, which comes directly after the presentation  
393 of the second cue. The former effect is perhaps more surprising. While the task type is  
394 changed in blocks and thus knowable to the animal on each trial (with the exclusion of  
395 block changes), there is no explicit need for the animal to store this information: the  
396 presence of a second sequence or an array of images will signal the task type without  
397 the need for prior knowledge. However, regardless of its functional role in this task,  
398 contextual encoding is a common occurrence (Eichenbaum et al., 2007; Komorowski  
399 et al., 2013). Furthermore, the fact that the recall task is more challenging than the  
400 recognition task may contribute to clear representation of task type. That is, it is  
401 possible that the animals keep track of the task type in order to know how much effort  
402 to exert during the task.

403 Approximately half of the cells (46) had some form of mixed selectivity, mostly to  
404 combinations of two task variables. The population had a roughly equal balance of  
405 both supra- and sublinear effects of these 2-way interactions (ratio of positive to neg-  
406 ative terms: 1.07). The small number of cells with selectivity to the 3-way interaction  
407 term (TTxC1xC2) is consistent with the relatively low value of  $RV$  in this population,  
408 as a strong preference for an individual condition would lead to a high  $RV$ . The number  
409 of cells with only mixed selectivity was low (only 1 out of 90 cells), 32 cells had only  
410 pure selectivity, and 12 cells had no selectivity.

411 We use a population-level analysis inspired by (Raposo et al., 2014) to measure the  
412 extent to which cell types are clustered into categories. Here, we used this analysis  
413 to determine if cells cluster according to their responsiveness to different task variable  
414 identities (i.e., recognition vs recall). That is, are there groups of neurons which all  
415 prefer the same task type and image identities, beyond what would be expected by  
416 chance? In order to explore this, we first use a general linear model (GLM), with task  
417 variable identities as regressors, to fit each neuron individually. The beta coefficients

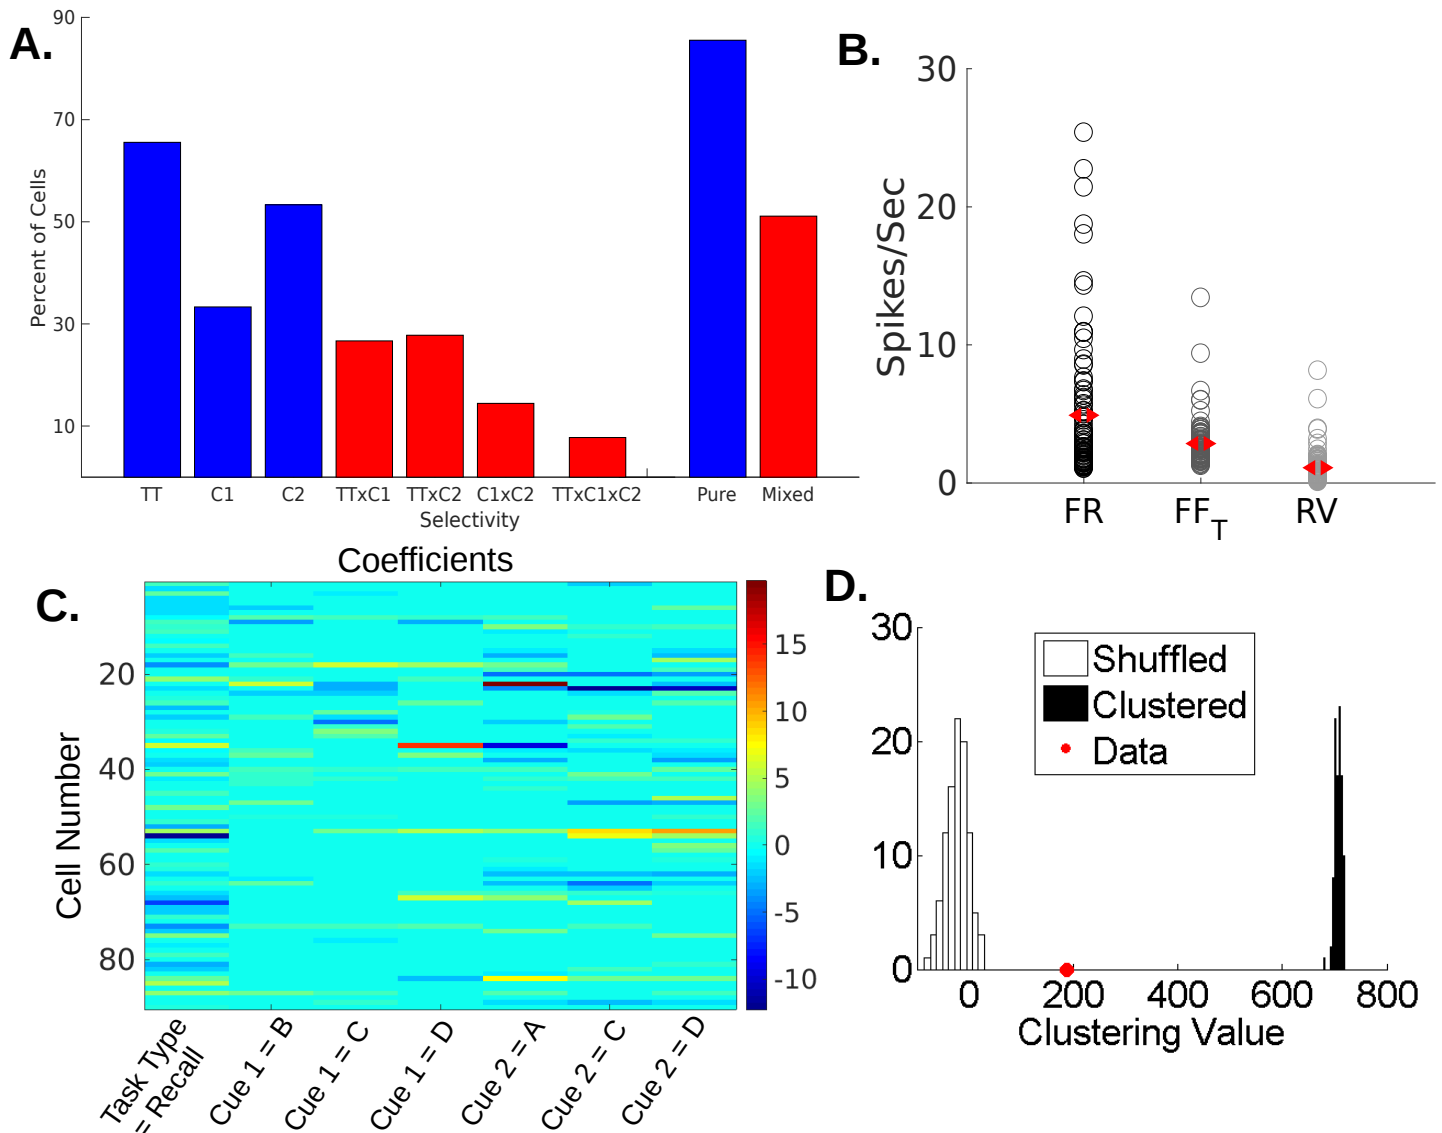

Figure 3: Results from the experimental data. A.) Selectivity profile of the 90 cells analyzed. A cell had pure selectivity to a given task variable if the term in the ANOVA associated with that task variable (TT=Task Type, C1=Cue 1, C2=Cue 2) was significant ( $p < .05$ ). A cell had nonlinear mixed selectivity to a combination of task variables if the interaction term for that combination (TTxC1=Task Type x Cue 1, TTxC2=Task Type x Cue 2, C1xC2=Cue 1 x Cue 2, TTxC1xC2=Task Type x Cue 1 x Cue 2) was significant. On the right of the vertical bar are the percent of cells that had at least one type of pure selectivity (blue) and percent of cells that had at least one type of mixed selectivity (red). B.) Values of firing rate,  $FF_T$ , and RV for this data. Each open circle is a neuron and the red markers are the population means. C.) Beta coefficients from GLM fits for each cell. The condition wherein Task Type = Recognition, Cue 1 = A, and Cue 2 = B was used as the reference condition. These values were used to determine the clustering value D.) Clustering values for data and comparison populations. The red dot shows the clustering value calculated using the GLM coefficients from the data. The shuffled data comes from shuffling the GLM coefficients across cells. The clustered data derives from populations of fake cells designed to have 3 different categories of cell types defined according to selectivity.

418 from these fits define a neuron’s position in selectivity space (these beta coefficient  
419 values, which represent how the identity of each task variable changes a neuron’s firing  
420 rate as compared to the reference condition, are shown in Figure 3C. A schematic of  
421 how the clustering measure works is shown in Figure 1D). After normalizing each  
422 vector, the clustering measure then determines the extent to which the population of  
423 vectors deviates from a uniform distribution on the unit hypersphere. The data had  
424 a clustering value of 186.2. Comparing this to the mean values of two distributions of  
425 artificially generated populations suggests the data has a mild but significant deviation  
426 from random: the average clustering value for populations generated by randomly  
427 shuffling the coefficient values is  $-23 \pm 22$ , and the average value of populations that  
428 have 3 distinct clusters of selectivity is  $706.7 \pm 6.8$ . As the data clustering value sits in  
429 between these values and closer to the shuffled data, we conclude that some structure  
430 does exist in the data, yet the cells in this population do not appear to form strongly  
431 separable categories as defined by task variable identity preference (Figure 3D).

### 432 *3.2. Circuit Model without Hebbian Learning Cannot Replicate Mix of Density and* 433 *Specialization*

434 A simple circuit model was made to replicate the selectivity properties found in  
435 the data. The model contains two layers: an input layer consisting of binary neurons  
436 that represent task variable identities and an output layer consisting of "PFC" neu-  
437 rons which get randomly-weighted input from the first layer and whose activity is a  
438 nonlinear function of the sum of that input. The model also has two forms of noise:  
439 an additive term applied before the nonlinearity (which replicates input/background  
440 noise, and implicitly shifts the threshold of the cell), and a multiplicative term applied  
441 after (which enforces the observed relationship between firing rate and variance) (see  
442 Methods and Figure 5A).

443 The output of the initial circuit model, prior to any Hebbian learning, was analyzed  
444 in the same way as the data to determine if it matched the properties found in PFC.  
445 The results of this can be found in Figure 4. First, in Figure 4A, we demonstrate the  
446 impact of the noise parameters on  $FF_T$ , pure and mixed selectivity, and the clustering  
447 value. As expected, increasing the additive and/or multiplicative noise terms increases  
448 the  $FF_T$ , as this is a measure of trial variability. Increasing within-condition noise also  
449 makes it less likely that a cell will show significant differences across conditions, and  
450 thus the percentage of cells with pure and mixed selectivity are inversely related to the  
451 noise parameters, (the relative sensitivities of mixed and pure selectivity to noise will  
452 be discussed in depth later). For similar reasons, the clustering value also decreases  
453 with noise (finding significant deviations from a uniform distribution is less likely if  
454 cells do not show sufficiently strong preferences).

455 To determine the impact other properties of the model had on our measures of in-  
456 terest, we varied several other parameters. Figure 4B shows what happens at different  
457 values of the threshold parameter. Here, the threshold is given as the amount of input  
458 the cell needs to reach half its maximal activity, expressed as a fraction of its total in-  
459 put weight (keep in mind that, given the number of input cells in each population and  
460 the task structure, roughly one-third of input cells are on per trial). The colored lines  
461 are, for each measure, the extent to which the model differs from the data, expressed  
462 in units of the model’s standard deviation (calculated over 100 instantiations of the  
463 model). Due to the impact of noise parameters discussed above, at each point in this  
464 graph the noise parameters were fit to ensure the model was within  $\pm 1.5$  standard

465 deviations of the data  $FF_T$  (this generally meant that it varied from  $\sim 2.8$  to 2.9).

466 With an increasing threshold, the RV (green line in Figure 4B) increases. This  
467 is because higher thresholds mean cells respond to only a few combinations of input,  
468 rather than responding similarly to many, and the RV is a measure of variability in  
469 response across conditions (note that while RV appears to peak at  $\approx .35$  and decrease,  
470 this particular trend is driven by an increase in RV standard deviation; the mean  
471 continues to increase). The percentage of cells with mixed selectivity (red line) also  
472 increases with threshold. With a higher threshold, the majority of conditions give  
473 input to the cell that lies in the lower portion of the sigmoidal function (bottom of  
474 Figure 5A). The nonlinearity is strong here—with some input producing little to no  
475 response—thus, more cells can attain nonlinear mixed selectivity. Pure selectivity also  
476 increases with threshold, and the percent of cells with pure selectivity goes quickly  
477 to 100 (and the standard deviation of the model gets increasingly small). We go into  
478 more detail about the reliance of selectivity on threshold later.

479 The clustering value relies on cells having preference for task variable identities  
480 and so increases as selectivity increases initially. However, just having selectivity is  
481 not enough to form clusters, and so the clustering value in the model levels off below  
482 the data value even as the number of cells with pure selectivity reaches full capacity.  
483 Thus, with the exception of the clustering value, the model can reach the values found  
484 in the data by using different thresholds. As Figure 4B shows, however, at no value of  
485 the threshold are all measures of PFC response in the model simultaneously aligned  
486 with those in the data.

487 Figure 4C shows how the same measures change when the width of the weight  
488 distribution from input to PFC cells is varied. Here, the standard deviation of the  
489 distribution from which connection strengths are drawn ( $\sigma_W$ ) is given as a factor of  
490 the mean weight,  $\mu_W$ . Increasing this value increases pure and mixed selectivity as  
491 well as RV. Because a wider weight distribution increases the chances of a very strong  
492 weight existing from an input cell to an output cell, it makes it easier for selectivity  
493 to emerge (that is, the output cell's response will be strongly impacted by the task  
494 variable identity the input cell represents). The RV increase occurs for similar reasons:  
495 a cell may have uneven responses across conditions due to strong inputs from single  
496 input cells. Clustering values, however, are unaffected by this parameter. At no point,  
497 then, can the model recreate all aspects of the data by varying the weight distribution.  
498 Furthermore, while values of mixed selectivity and RV approach the data values with  
499 large  $\sigma_W/\mu_W$ , such large values are likely unrealistic. Data show that a  $\sigma_W/\mu_W$   
500 ratio of around 1 is consistent with observations of synaptic strengths from several brain  
501 areas (Barbour et al., 2007).

502 Varying other parameters such as the mean weight, number of cells per population,  
503 and connection probability similarly doesn't allow the model to capture all properties  
504 of the data (not shown).

505 Figure 4D shows the values of the model as compared to the data for the set of  
506 parameters marked with arrows in Figure 4B and 4C. For reasons that will be discussed  
507 more later, these parameters were chosen because they were capable of capturing the  
508 amount of pure selectivity in the model (any lower value of the threshold would lead  
509 to too few cells with pure selectivity, for example). On the left are the percentage of  
510 cells with different selectivities as in Figure 3C. The bars are the data and the lines  
511 are the model. On the right, are histograms of model values from 100 instantiations,  
512 with the red markers showing the data values. The model matches the average firing



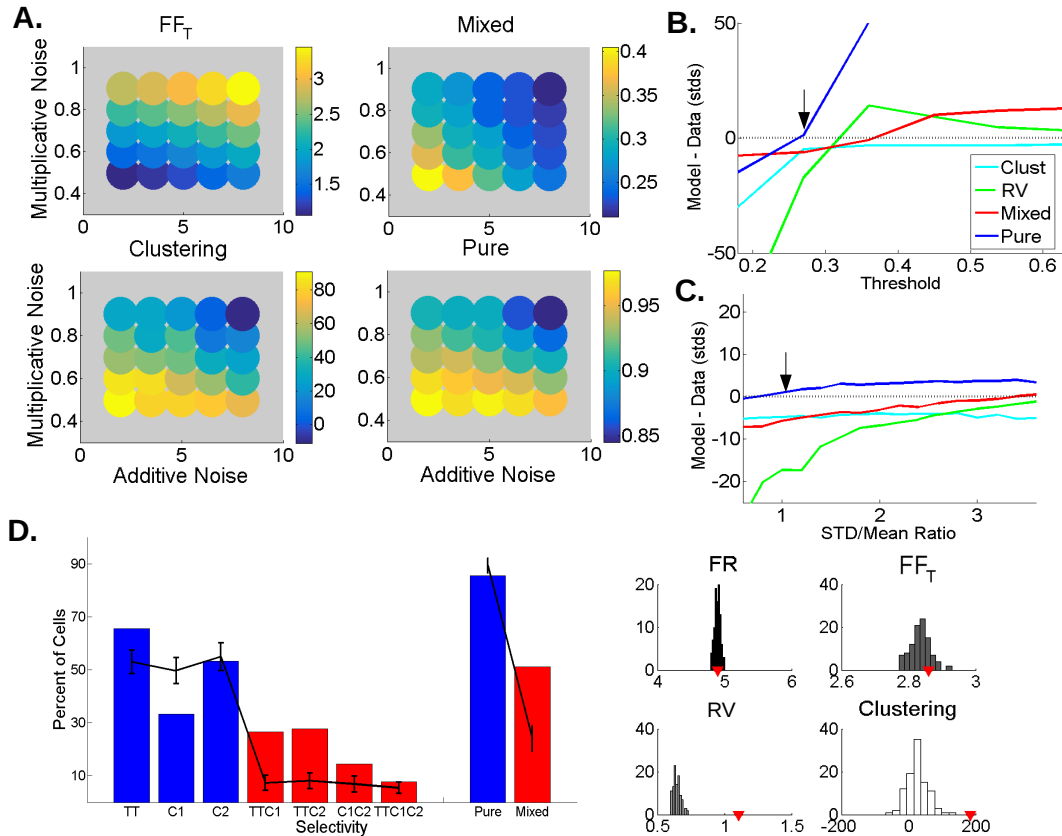

Figure 4: Results from the model without learning. A.)  $FF_T$  and other measures can be controlled by the additive and multiplicative noise parameters. Each circle's color shows the value for the given measure averaged over 25 networks, for a set of  $a$  and  $m$  values (see Methods).  $FF_T$  scales predictably with both noise parameters. Fraction of cells with mixed selectivity, fraction of cells with pure selectivity, and clustering scale inversely with the noise parameters. Other model parameters are taken from the arrow locations in (B) and (C). B.) How the threshold parameter,  $\lambda$ , affects measures of selectivity. Lines show how the average value of the given measure in the model (in units of standard deviations calculated over 100 random instantiations of the model) differs from the data as a function of the threshold parameter  $\lambda$ , where  $\Theta_i = \lambda \sum_j w_{ij}$ . At each point noise parameters are fit to keep  $FF_T$  close to the data value. Note that std values for mixed selectivity and clustering remain steady across threshold values at approximately 4% and 20.7 respectively. RV std however increases from .0087 to 4.3 spikes/sec and pure selectivity std trends toward zero as all cells gain pure selectivity. C.) Same as (B), but varying the width of the weight distribution rather than the threshold parameter. Here, RV std increases only slightly, from .02 to .048 spikes/sec, pure selectivity std decreases slightly from 4.0% to 2.5% and mixed selectivity and clustering stds remain fairly constant around 4.9% and 31.2 respectively. D.) Example of the model results at the points given by the black arrows in (B) and (C). On the left, blue and red bars are the data values as in Fig 2. The lines are model values (averaged over 100 networks, errorbars  $\pm 1$  std). On the right, histograms of model values over 100 networks. The red markers are data values. This model has no learning.

513 rate and  $FF_T$  of the model, as it was fit to do so. Clustering, RV, and the amount of  
514 mixed selectivity are too low in the model. We use these parameters as the starting  
515 point for learning in this model.

### 516 3.3. Circuit Model with Hebbian Learning Captures PFC Responses

517 As described above, responses of PFC cells have a set of qualities that cannot be  
518 explained by random connectivity. In particular, the inability of the random network to  
519 simultaneously capture the values of response variability, clustering, pure, and mixed  
520 selectivity shows that PFC cells have a balance of specialization that may require  
521 learning to achieve. Here, we tested two variants of Hebbian learning to determine if  
522 a network endowed with synaptic plasticity can capture the elements of the data that  
523 the random network could not. The simple form of Hebbian learning that we use is  
524 based on the idea that the input populations that randomly start out giving strong  
525 inputs to a cell would likely make that cell fire and thus have their weights increased.

526 In both variants of learning tested, each cell has the weights from a subset ( $N_L$ )  
527 of its input populations increased while the rest are decreased to keep overall input  
528 constant (this is done via a weight increase step and a normalization step). Such  
529 balancing of Hebbian and homeostatic plasticity has been observed experimentally  
530 (Keck et al., 2017), particularly via the type of synaptic up and down regulation used  
531 here (Chistiakova and Volgushev, 2009; Bourne and Harris, 2011; Scanziani et al.,  
532 1996; Lo and Poo, 1991). Therefore, it is plausible for an individual neuron to be able  
533 to implement such changes across its synapses.

534 The difference between our two variants of learning comes from which input pop-  
535 ulations are increased. In general, the top  $N_L$  input populations from which the cell  
536 already receives the most input have their weights increased (to capture the "rich get  
537 richer" nature of Hebbian learning). In the "constrained" variant, however, weight  
538 increases onto a PFC cell are restricted to populations of input cells that come from  
539 different task variables (e.g., cue 1 and cue 2. For a detailed explanation see Methods).  
540 This was done to ensure that cells had enough variety of inputs to create mixed selec-  
541 tivity. In the free variant, the populations from which a cell receives increased input  
542 due to learning are unrestricted. That is, they are determined only by the amount of  
543 input that the cell originally received from each population as a result of the random  
544 connectivity. This unrestricted form of learning is more biologically plausible as it can  
545 be implemented in a way that is local to the post-synaptic neuron, without knowledge  
546 of the identity of the upstream inputs. A toy example of each variant can be found in  
547 Figure 5B. In this example, free and constrained learning select different input popu-  
548 lations to be enhanced, however, given random weights, free and constrained learning  
549 will select the same input populations in some cells.

550 Figure 5C shows how the weight matrix changes with different  $N_L$  values (the  
551 number of populations from which weights are increased during learning). Eventually,  
552 the learning leads to a steady state in which each PFC cell receives input only from  
553 cells in the top  $N_L$  populations. The higher the  $N_L$  the faster the matrix converges to  
554 its final state. When  $N_L$  is low, convergence takes longer as all the weight is transferred  
555 to a small number of cells. This plot is shown with a learning rate of .2.

556 The results of both forms of learning are shown in Figure 6A. The effects of learning  
557 are dependent on  $N_L$ , and different  $N_L$  values are in different colors ( $N_L = 1, 2, 3$  are  
558 tested here). Free learning is shown with solid lines, and constrained with dotted lines,  
559 except for the case of  $N_L = 1$ , where free and constrained learning do not differ and

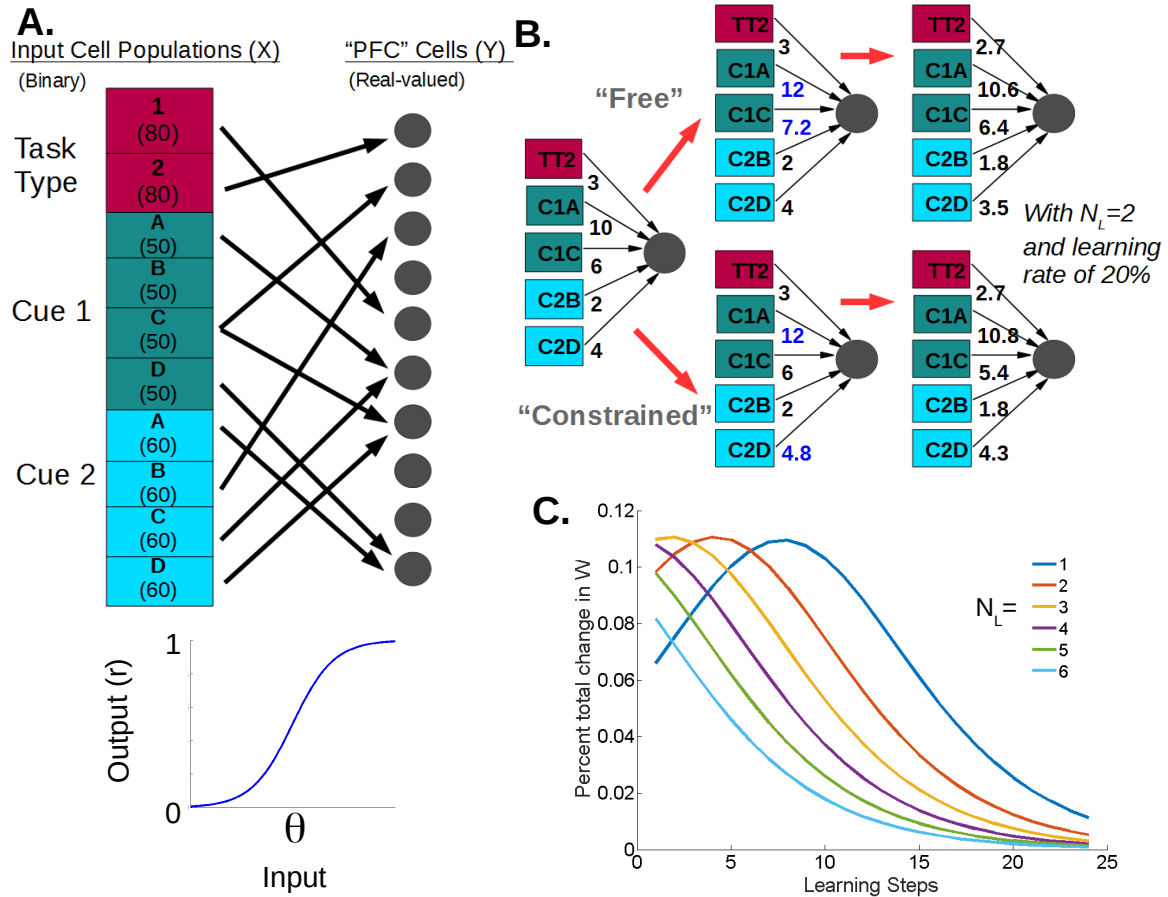

Figure 5: The full model and how learning occurs in it. A.) The model consists of groups of binary input neurons (colored blocks) that each represent a task variable identity. The number of neurons per group is given in parenthesis. Each PFC cell (gray circles) receives random input from the binary cells. Connection probability is 25% and weights are Gaussian-distributed and non-negative. The sum of inputs from the binary population and an additive noise term are combined as input to a sigmoidal function (bottom). The output of the PFC cell on a given trial is a function of the output of the sigmoidal function,  $r$  and a multiplicative noise term (see Methods). The threshold,  $\Theta$ , is given as percentage of sum total of the weights into to each cell B.) Two styles of learning in the network, both of which are based on the idea that the input groups that initially give strong input to a PFC cell have their weights increased with learning (sum of weights from each population are given next to each block). In free learning, the top  $N_L$  input populations are chosen freely. In this example, that means two groups from the cue 1 task variable have their weights increased (marked in blue). In constrained learning, the top  $N_L$  populations are chosen with the constraint that they cannot come from the same task variable. In this case, that means that cue 2D is chosen over cue 1C despite the latter having a larger summed weight. In both cases, all weights are then normalized. C.) Learning curves as a function of learning steps for different values of  $N_L$ . Strength of changes in the weight matrix expressed as a percent of the sum total of the weight matrix are plotted for each learning step (a learning step consists of both the weight increase and normalization steps). Different colors represent different  $N_L$ s.

560 only one line is shown. In each plot, the data value is shown as a small black dotted  
561 line.

562 Clustering, mixed selectivity, and RV all increase with learning, for any value of  $N_L$   
563 and both learning variants. When  $N_L = 1$  (green line), mixed selectivity peaks and  
564 then plateaus at a lower value (as connections to all but one population are pruned),  
565 while other values of  $N_L$  plateau at their highest values. As it was designed to do so,  
566 constrained learning is very effective at increasing mixed selectivity, eventually getting  
567 to nearly 100 percent of cells. Free learning produces more modest increases in mixed  
568 selectivity, with  $N_L = 2$  leading to slightly larger increases than  $N_L = 3$ . Before  
569 learning, the model matches the data's balance of supra- and sublinear interaction  
570 effects (ratio of positive to negative terms:  $1.100 \pm .048$ ), and learning does not  
571 impact this balance ( $1.095 \pm .053$ , STDs over 20 random instantiations).

572 A factor impacting selectivity in this model—and especially with this task structure—  
573 is that cells that receive inputs from multiple populations from a single task variable  
574 may not end up having significant selectivity to that variable. This is especially true  
575 for the 'task type' variable, as cells can easily end up with input from both 'recall' and  
576 'recognition' populations. If the inputs from these populations are somewhat similar in  
577 strength, the cell does not respond preferentially to either. This can help understand  
578 the discrepancy in how pure selectivity changes with free and constrained learning. In  
579 constrained learning, pure selectivity necessarily increases with learning (to the point  
580 where nearly all networks have 100% pure selectivity), whereas free learning can have  
581 inputs that effectively cancel each other out. A more direct investigation of how se-  
582 lectivity and other properties change with learning comes with the analysis of our toy  
583 model in the next two sections.

584 In these plots, both noise parameters are fixed, which allows us to see how  $FF_T$   
585 varies with learning (this is also why the values at step 0 in Figure 6A do not always  
586 match those shown in Figure 4, as that model has noise parameters fit to match the  
587 data). The changes in  $FF_T$  stem from both changes in robustness to the additive noise  
588 and from changes in the mean responses, which impacts  $FF_T$  via the multiplicative  
589 noise term. Figure 6A shows that the variant of learning has less of an impact on  $FF_T$   
590 than  $N_L$  does. In all cases, however, learning ultimately leads to lower trial variability  
591 in the model. This is consistent with observation made in PFC during training (Qi  
592 and Constantinidis, 2012).

593 Overall, low  $N_L$  leads to more acutely distributed weights and stronger structure  
594 and selectivity in the model. Constrained learning, with its guarantee of enhancing  
595 weights from different task variables, is also more efficient at enhancing structure  
596 and selectivity. The prefrontal cortex data shows a moderate level of structure and  
597 selectivity, therefore the approach that is best able to capture it is free learning with  
598  $N_L = 3$ . In Figure 6B, we show how all of the model values compare to the data as  
599 this form of learning progresses. These plots, similar to Figure 4B and C, show values  
600 in units of standard deviations away from the model. It is clear from these plots that  
601 this form of learning leads all values in the model closer to those of the data. The  
602 best fit to the data comes after 6 learning steps with a learning rate of .2 (marked  
603 with a black arrow). At this point the ratio of the standard deviation to the mean  
604 of the weight distribution has only slightly increased, remaining within a biologically  
605 plausible range. While the best fit to the data comes before the model reaches its steady  
606 state, all values still eventually plateau to within  $\pm 2.5$  model standard deviations of  
607 the data. Furthermore, there are many reasons why PFC may not reach steady state;

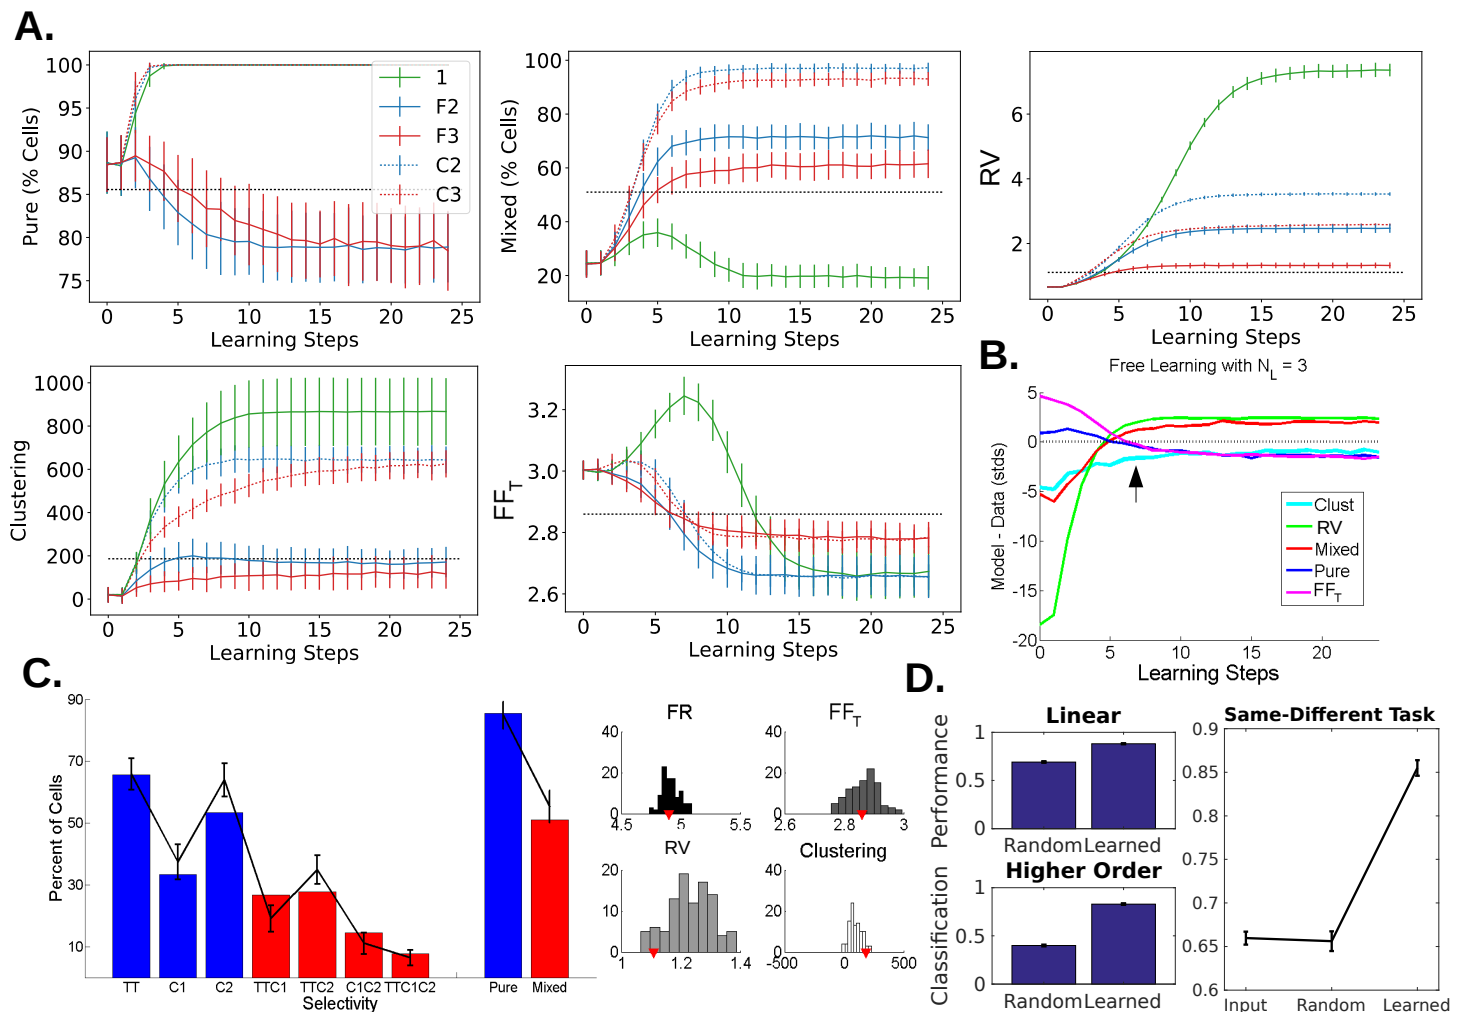

Figure 6: The model with learning. A.) How selectivity measures change with learning. In each plot, color represents  $N_L$  value, solid lines are free learning, and dotted lines are constrained learning (only one line is shown for  $N_L = 1$  as the free and constrained learning collapse to the same model in this circumstance). Step 0 is the random network. Black dotted lines are data values and errorbars are  $\pm 1$  std over 100 networks. In the pure selectivity plot, with constrained learning and when  $N_L = 1$ , the value maxes out at 100% in essentially all networks, leading to vanishing errorbars. B.) All measures as a function of learning for the  $N_L = 3$  free learning case. Values are given in units of model standard deviation away from the data value as in Figure 4B and C. C.) The model results at the learning step indicated with the black arrow in (B). On the left, blue and red bars are the data values as in Figure 3. The lines are model values (averaged over 100 networks, errorbars  $\pm 1$  std). On the right, histograms of model values over 100 networks. The red markers are data values. Here, the model provides a much better match to the data. D.) Decoding performance increases with learning. Average performance of classifiers trained to readout linear terms (top left) and higher order terms (bottom left) from PFC population activity increases after learning compared to the random network (learned model indicated by arrow in (B)). Errorbars are  $\pm 1$  SEM, over 10 random instantiations of the network. Read out of same vs. different cue identities is better when using the PFC population after learning (right).

608 for example, once the animal’s performance plateaus, learning may slow (Glimcher,  
609 2011). Also, other uses of PFC may interfere with learning and prevent the circuit  
610 from overfitting to this particular task. A detailed exploration of these mechanisms is  
611 beyond the scope of this study.

612 We plot the values of the data in comparison to the best-fit model in Figure 6C,  
613 similarly to Figure 4D. At this point, the average percent of cells with only pure  
614 selectivity is  $25.4 \pm 4.2$ , with only mixed  $4.4 \pm 2.2$ , and with no selectivity  $15.9 \pm 4.1$  (the  
615 comparable data values are  $\approx 36\%$ ,  $1\%$ , and  $13\%$ , respectively). Thus, the model with  
616 learning is a much better fit to the data than the purely random network.

617 In addition to matching the measured properties of the PFC representation, we  
618 also tested if learning makes the neural representation more conducive to decoding.  
619 To do this for task information, we trained linear classifiers to readout out the task  
620 inputs (i.e., the identities of task type, cue 1, and cue 2 separately) as well as higher  
621 order terms (i.e., the combined identities of task type-cue 1, task type-cue 2, cue 1-cue  
622 2, and task type-cue 1-cue 2). As expected from a higher dimensional representation,  
623 decoding performance is better in the population after learning, for both linear and  
624 higher order terms (Figure 6D, left). Post-learning accuracy for linear terms is  $83.2\%$   
625 and for the higher-order terms  $70.5\%$  (the respective values for constrained learning  
626 after the same number of steps are  $88.2\%$  and  $83\%$ , not shown). We also used a  
627 same-different task to demonstrate how the representation after learning allows for  
628 better performance on a non-linearly separable problem. Here, all combinations of cue  
629 1 and cue 2 identities were generated as inputs, and a linear classifier was trained to  
630 readout if the identities of the two cues were the same or not. Trying to read this  
631 information out from the input population is not very successful as these cells only  
632 have pure selectivity (Figure 6D, right). Random connectivity is sufficient to expand  
633 the dimensionality of the neural representations and to solve non-linearly separable  
634 problems. However, the model PFC population generated from random connectivity  
635 performs poorly because the low threshold that we determined by fitting the model to  
636 the data leads to low levels of mixed selectivity. After learning, the PFC population  
637 performs substantially better on this task.

### 638 *3.4. Understanding Properties of Selectivity Before Learning*

639 We have shown that Hebbian learning can impact selectivity properties in a model  
640 of PFC. Some of these impacts, particularly the increase in mixed selectivity, may seem  
641 counterintuitive. Here we use a further simplified toy neuron model to understand the  
642 properties of the network before learning and then demonstrate how learning causes  
643 these changes.

644 A schematic of this toy model is in Figure 7A, and it is described in the Methods.  
645 Briefly, the cell gets four total inputs—two (A and B) from each of two task variables  
646 (T1 and T2). The output of the cell is binary: if the weighted sum of the inputs is  
647 above the threshold,  $\Theta$ , the cell is active and otherwise it is not. As in the full model,  
648  $\Theta$  is defined as a fraction,  $\lambda$ , of the sum of the input weights.

649 This format makes it easy to spot nonlinear mixed selectivity: if the cell is active  
650 (or inactive) for exactly one of the four conditions, it has nonlinear mixed selectivity  
651 to the combination of T1-T2. If the cell’s output can be determined by the identity of  
652 only one task variable, it has pure selectivity (and would be active for two of the four  
653 conditions). Otherwise it has no selectivity (active or inactive for all conditions) (see  
654 examples in Figure 2A and B).

655 Learning impacts selectivity by altering the way a cell represents these four condi-  
656 tions. To say more about how this occurs, we must first describe the properties of the  
657 representation in the random network before learning.

658 To be robust to noise, the cell's response should be constant across trials within a  
659 condition. Additive noise can be thought of as a shift in the threshold, which may  
660 lead to a change in the cell's response. Thus, trialwise additive noise drawn from  
661 a distribution centered on zero can be thought of as a range of effective thresholds  
662 centered on the original one (black dotted line in Figure 8A is the threshold without  
663 noise and the gray shaded area is the range of effective thresholds due to noise). If  
664 the inputs for a given condition fall in this range, the response of the cell will be  
665 noisy, i.e. flipping from trial to trial, and selectivity will be lost because the cell's  
666 activity will not be a reliable indicator of the condition. Robustness to noise, then,  
667 can be measured as the range of thresholds a representation can sustain without any  
668 responses flipped, with a larger range implying higher noise robustness (if noise is  
669 drawn from a Gaussian distribution the noise range can represent thresholds within  
670 two standard deviations, for example, implying that a cell is robust to noise as long  
671 as its response is consistent on 95% of trials).

672 Assuming optimal threshold values (i.e., those with highest noise robustness) for  
673 each type of selectivity, the relative noise robustness of mixed and pure selectivity  
674 can be calculated (see Methods). We find that, thinking of the four conditions as the  
675 corners of a rectangle (as visualized in Figure 2C), mixed selectivity robustness depends  
676 on the length of the shorter side, while pure selectivity noise robustness depends on the  
677 difference between the two side lengths. We also find that, with random weights, most  
678 cells will have a representation that has higher noise robustness for pure selectivity  
679 than for mixed (see Methods).

680 Noise robustness changes, however, as thresholds deviate from optimal. The type  
681 of selectivity cells have in the absence of noise also varies with threshold in a related  
682 way. For example, using a low threshold may result in more cells with mixed selec-  
683 tivity and/or cells with pure selectivity that have low noise robustness (see Figure 2D  
684 for examples). To quantify these trends, we varied the threshold parameter  $\lambda$  and  
685 determined both the probability of different types of selectivity as well as the noise  
686 robustness for each type (see Methods for details). In Figure 7B, we show the fraction  
687 of cells that lose selectivity at a given noise level, for three different values of  $\lambda$ . Noise  
688 robustness (plotted as a function of  $\lambda$  in Figure 7C) is defined then as a normalized  
689 measure of the noise value that causes 50% of cells to lose selectivity.

690 Figure 7C demonstrates why the random network from which we start learning is  
691 necessarily in a condition of low mixed selectivity. Specifically, the value of  $\lambda$  we choose  
692 to use is constrained by the fact that the data shows high levels of pure selectivity.  
693 Therefore, we need a value that has high probability of pure selectivity and high noise  
694 robustness for it (especially because, as we will show, pure selectivity is unlikely to  
695 increase much with learning). Values of  $\lambda$  that meet this condition are not favorable  
696 for mixed selectivity. Therefore, the best we can do is choose a value of, for example,  
697 .4, where probabilities of pure and mixed selectivity are even, but pure has higher  
698 noise robustness (therefore effective rates of pure selectivity are higher). The fact that  
699 mixed selectivity is less noise robust than pure in the full model can be seen in Figure  
700 4A.

701 Note that while the  $\lambda$  used for the random version of the full model shown in Figure  
702 4D was around .27, that value is not directly comparable to the  $\lambda$  values in these plots

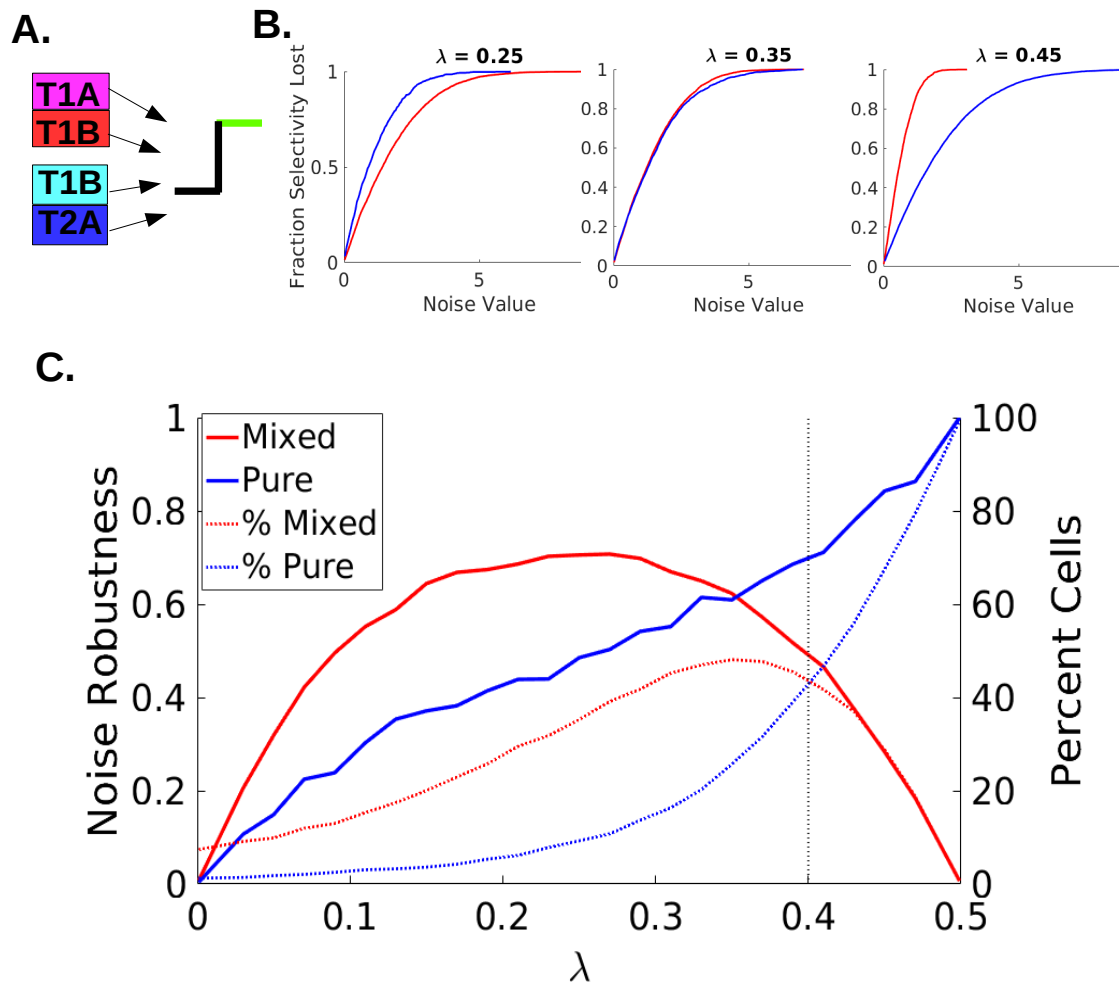

Figure 7: How noise robustness varies with threshold in a random network using the toy model A.) Schematic of the toy model: four input populations (two from each task variable) send weighted inputs to a cell with a threshold ( $\Theta$ ) nonlinearity B.) For a given noise value, the fraction of cells that would lose selectivity if that noise value were used. Values are separated for cells with pure (blue) and mixed (red) selectivity. Three  $\lambda$  values shown, where  $\Theta = \lambda \Sigma W$ . C.) Based on plots like those in (B), the noise value at which 50% of cells have lost selectivity is calculated ("Noise Robustness" refers to these values normalized by the peak value. Higher values are better) and plotted as a function of  $\lambda$  (solid lines). On the same plot, the percent of cells with each type of selectivity in the absence of noise is shown (dotted lines). The black dotted line marks a  $\lambda$  value at which the probability of mixed and pure selective cells is equal, but their noise robustness is unequal. This plot is mirror-symmetric around  $\lambda = .5$

703 for many reasons. First, the full model has 3 task variables, compared to the 2 used  
 704 in the toy model. This means that, from the perspective of mixed selectivity for 2  
 705 task variables, a given  $\lambda$  value will create a higher  $\Theta$  in the full model with 3 task  
 706 variables than in the toy one that has only 2 (because  $\Theta$  is a function of the sum total  
 707 of all weights, not just those relevant for the 2-way selectivity). In addition, in the toy  
 708 model, 50% of the inputs are on for any given condition, whereas the nature of the  
 709 task in the full model means that only 25% of inputs are on when looking at C1xC2  
 710 mixed selectivity, while one-third are on for TTxC1, TTxC2, and TTxC1xC2 mixed  
 711 selectivity. The percentage of cells are also not directly comparable, as cells in the full  
 712 model are labeled as pure if they have any of 3 different types of pure selectivity, and  
 713 mixed if they have any of 4 different types of mixed. This toy model is thus meant to



714 provide intuition only.

### 715 *3.5. How Learning Impacts Selectivity*

716 For the reasons just discussed, the random model starts in a regime where pure  
717 selectivity has high noise robustness and mixed does not. In order to match the amount  
718 of mixed selectivity seen in the data, we must then rely on learning to increase noise  
719 robustness for mixed selectivity, allowing more mixed cells to move out of the noise  
720 range.

721 Learning impacts noise robustness by expanding the representation of the different  
722 conditions. An example of this is in Figure 8A, where the gray shaded area repre-  
723 sents the noise-induced range of the threshold. Before learning, the cell's response is  
724 impacted by the noise. With learning, different conditions get pulled away from each  
725 other and the threshold, creating a much more favorable condition for mixed selectivity  
726 to be robust to noise. As can be seen, the responses are now outside the noise range.

727 For the same reason that learning increases noise robustness (because the expansion  
728 increases the range of thresholds that support mixed selectivity), it can also increase  
729 the probability of a cell having mixed selectivity in the absence of noise. This can  
730 be seen in Figure 8C (left), where learning steps are indicated by increasing color  
731 brightness (constrained learning with rate of .25). At lower  $\lambda$  values, cells that are  
732 initially above threshold for all conditions (no selectivity) gain mixed selectivity with  
733 learning. But for  $\lambda$  values that support higher levels of pure selectivity (e.g.,  $\lambda = .4$ ,  
734 marked with a black dotted line), the percent of cells with mixed is not as impacted  
735 by learning. The percent of cells with pure selectivity increases only slightly at most  
736  $\lambda$  values.

737 Noise robustness has a different pattern of changes with learning (Figure 8C, right).  
738 In particular, at  $\lambda = .4$ , the noise robustness still increases with learning even when  
739 the percent of cells with mixed selectivity doesn't change. Furthermore, when starting  
740 from a  $\lambda$  value that has unequal noise robustness for pure and mixed selectivities, if  
741 most cells with pure selectivity are already robust to a given noise value, an increase  
742 in noise robustness for pure would only have a moderate effect on the population  
743 levels of pure selectivity. Conversely, if most mixed cells have noise robustness less  
744 than the current noise value, an increase in that robustness could strongly impact the  
745 population. In the same vein, a decrease in robustness will impact the pure population  
746 more than the mixed. Thus, changes in noise robustness seem to play a large role in  
747 the increase in mixed selectivity observed in the full model.

748 In particular, constrained learning with  $N_L = 2$  always increases the lengths of  
749 both sides of the rectangle (as one weight from each task variable increases and the  
750 other decreases). As mentioned above, noise robustness for mixed selectivity scales  
751 with the length of the shorter side and so it necessarily increases with learning in this  
752 condition. Under certain weight conditions, noise robustness will also increase for cells  
753 with pure selectivity (this can be seen in Figure 8C, see Methods for details).

754 If  $N_L = 1$ , only one side length will increase and the other decrease. If the shorter  
755 side decreases, mixed selectivity noise robustness decreases. If the shorter side in-  
756 creases, mixed noise robustness increases, up until the point at which side lengths  
757 are equal. At that point the shorter side is now the decreasing side and mixed noise  
758 robustness goes down. This trend is reflected in the shape of the mixed selectivity  
759 changes seen with  $N_L = 1$  in Figure 6A (mixed selectivity increases then decreases).

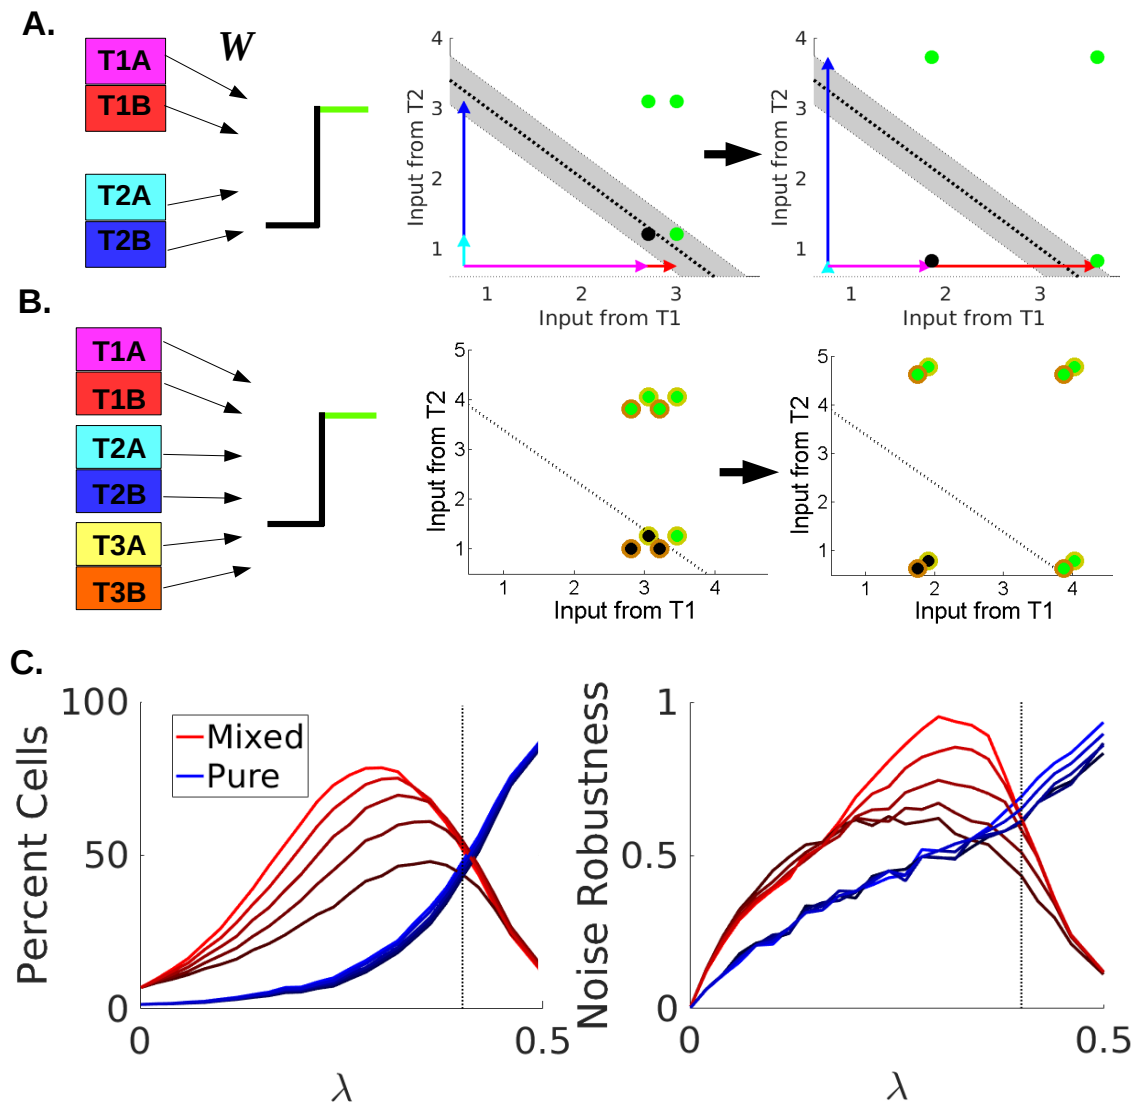

Figure 8: How learning impacts noise robustness A.) A simple toy cell (left) with 2 task variables is used to show the effects of learning. The 4 possible conditions are plotted as dots (green if above threshold, black if not), with the threshold as a dotted black line. Colored arrows represent the weights from each population. Before learning (middle), the cell's input on two of the conditions falls within the range of the shifting threshold created by additive noise (gray area). After learning, all conditions are outside the noise range. B.) A third task variable is added to the model and is another source of additive noise from the perspective of T1-T2 selectivity. The model's outputs are color-coded according to which T3 population is active. Weight arrows are omitted for visibility. After learning with  $N_L = 2$ , input strength from T3 populations are decreased and the points from the same T1-T2 condition are closer together (less noisy). C.) How the percent of cells with a given selectivity (left) and their noise robustness (right) change with constrained learning as a function of the threshold parameter  $\lambda$ . Learning steps are symbolized by increasing color brightness (the darkest line is the random model as displayed in Figure 7C, and the dashed line shows where the percent of mixed and pure are the same in the random model)

760 When using free learning (with  $N_L = 2$ ), a portion of the cells will by chance  
761 have the same changes as with constrained learning. The remaining cells cause the  
762 differences observed between the two versions of learning, and can be of two types.  
763 In the first type, the larger side length increases and the smaller shrinks, causing a  
764 decrease in mixed noise robustness. Free learning doesn't achieve the same levels of  
765 mixed selectivity as constrained because these cells continue to be too noisy. In the  
766 other type, the shorter side increases and the larger decreases, reducing the difference  
767 between the two side lengths and thus reducing pure noise robustness. Free learning  
768 loses pure selectivity as these cells become too noisy (as seen in 6A). More detailed  
769 descriptions of changes with learning can be found in the Methods.

770 Inputs from additional task variables can be thought of as a source of noise as well.  
771 In Figure 8B, we add a third task variable to the toy model. Now, in the case of the  
772 T1B-T2A condition, the identity of T3 determines if the cell is active or not. From  
773 the perspective of T1-T2 mixed selectivity, this has the same impact as shifting the  
774 threshold, and thus creates noise. If both T3 inputs are weaker than the strongest  
775 two inputs from T1 and T2 (as they are here), they will decrease with learning. This  
776 means that not only do different T1-T2 conditions get pulled apart with learning, but  
777 the same T1-T2 conditions become closer. This reduces the impact of "noise" from  
778 other task variables, and explains why mixed selectivity increases more with  $N_L = 2$   
779 than with  $N_L = 3$  (Figure 6A).

780 In sum, learning changes a cell's representation of the task conditions. Depending  
781 on the threshold value, this can create changes in the probability of mixed and pure  
782 selectivity and the relative noise robustness for each. Here, in order to match the  
783 high levels of pure selectivity seen in the data, we use a threshold regime where mixed  
784 selectivity noise robustness increases with learning. This causes a gain in the number  
785 of cells with mixed selectivity, such that it reaches the level seen in the data.

### 786 *3.6. How Learning Impacts Other Properties*

787 The visualization of this toy model gives intuition for why other properties change  
788 with learning as well. RV, for example, increases with learning (Figure 6A). The ex-  
789 pansion that comes with learning places different conditions at different distances from  
790 the threshold. With a sigmoidal nonlinearity, this would translate to more variance in  
791 the responses across conditions, increasing RV. Because constrained learning ensures  
792 the most expansion, it increases RV more. These increases depend on  $N_L$  because  
793 lower  $N_L$  allows for a more extreme skewing of weights, and thus a subset of condi-  
794 tions will be far above threshold while the rest are below (leading to a high RV). RV  
795 has a limit, however, because even with  $N_L = 1$ , the cell would still respond equally  
796 to a quarter of the conditions (assuming an input from a cue variable)

797 Clustering values are also impacted by how selectivity changes. Clustering in the  
798 data appears to be driven by task type selectivity (Figure 3C), and as task type  
799 preferences develop in the model the clustering value increases. Here, the relative sizes  
800 of the input populations play a role. Because the input populations that represent task  
801 type contain more cells (Figure 5A), these populations are more likely to be among  
802 the strongest inputs to a cell, and thus have their weights increased (Note that this  
803 bias in favor of task type could also arise from the fact that only two task types are  
804 possible, and thus these inputs are on twice as often as cue inputs. Such a mechanism  
805 cannot be implemented in this model, however, so we use uneven numbers of input  
806 cells). Therefore, task type selectivity becomes common and clusters form around

807 the axis representing the first regressor (which captures task type preference). This  
808 effect is weaker with free learning because both task type populations may have their  
809 weights increased, which diminishes the strength of task type preference. Lower  $N_L$ ,  
810 which minimizes preferences to other task variable identities, allows these clusters to  
811 be tighter.

812 Finally, it is important to note that the strength of inputs shown in Figures 2  
813 and 8 (the colored arrows) correspond to, in the full model, the summed input from  
814 all cells representing a given task variable identity (i.e.,  $I_i^p$ ), not just to weights from  
815 individual cells. These summed values are what need to change in order to expand the  
816 representation and see the observed changes. This is important for why the Hebbian  
817 procedure described here is effective at changing selectivity, as it assumes that many  
818 cells, acting in unison to cause post-synaptic activity, would lead to the increase of their  
819 individual synaptic weights, and thus an increase in the sum of those weights. Merely  
820 increasing the variance of the individual weights does not cause such a coordinated  
821 effect and would be less effective at driving these changes (as was shown in Figure 4C),  
822 especially with larger input population size.

#### 823 4. Discussion

824 Here, motivated by several theoretical proposals about properties that would ben-  
825 efit encoding, we explored how prefrontal cortex represents task variables during a  
826 complex task. In particular we were interested in measures of selectivity (particularly  
827 nonlinear mixed selectivity), response density, and clustering of cell types according  
828 to preferences. By quantifying and measuring these properties in a PFC dataset, this  
829 work connects theoretical literature with experimental data to give insight into how  
830 PFC is able to support complex and flexible behavior. Furthermore, we explored how  
831 these response properties could be generated by a simple network model. Through  
832 this, we find evidence that the particular level of specialization and structure in the  
833 PFC response is not readily achievable in a random network without Hebbian learning.  
834 After Hebbian learning, the model—despite its relative simplicity—is able to capture  
835 many response properties of PFC. The changes that come with learning act via an  
836 expansion of the way cells represent conditions, and corresponding changes in noise  
837 robustness.

838 Interestingly, the variant of Hebbian learning that best matches the data is not the  
839 most effective at increasing mixed selectivity. It may be that the more effective method  
840 (“constrained” learning) would be too difficult to implement biologically, but perhaps  
841 there is also a computational benefit to the balance of mixed and pure selectivity found  
842 in the data. Particularly, preventing high levels of selectivity to this particular task  
843 may allow the network to retain flexibility.

844 In addition to retrospectively matching experimental results, this model also makes  
845 predictions regarding how certain values should change with training. In particular,  
846 clusters of cells defined by selectivity are expected to emerge with training and cell  
847 responses should become less dense across conditions. Previous work (Rigotti et al.,  
848 2013) has shown the value of mixed selectivity for the ability of a population to per-  
849 form complex tasks. This work shows that mixed selectivity increases with learning,  
850 and these changes in PFC may correspond to increases in performance (Pasupathy  
851 and Miller, 2005), as learning in our model leads to increases in performance on clas-  
852 sification tasks. Perhaps surprisingly, this model also predicts a concurrent, though

853 small, decrease in pure selectivity. However, studies that have tracked PFC responses  
854 during training show signs of these changes. For example, in (Meyer et al., 2011),  
855 the amount of pure selectivity was measured directly pre- and post-training, and a  
856 significant drop in the percent of cells with pure selectivity was indeed observed. Fur-  
857 thermore, in hippocampus, an increase in mixed selectivity and slight decrease in pure  
858 was also observed with learning (Komorowski et al., 2009). In Meyers et al. (2012), the  
859 ability to readout match/nonmatch of two input stimuli from the population increases  
860 dramatically with learning, suggesting an increase in mixed selectivity. However, the  
861 ability to decode the identity of the stimuli (in the comparable portion of the trial)  
862 decreases slightly after training, which would be at odds with our linear classification  
863 results.

864 Our model makes many simplifying assumptions. The inputs, for instance, are  
865 binary cells that encode only the identity of different task variables. While this implies  
866 that the cells representing cue identities already have mixed selectivity (responding to  
867 the combination of the image and its place as either cue 1 or cue 2), it is still an  
868 assumption that the cells providing input to PFC are otherwise unmixed. This is  
869 something that, given current experimental evidence seems plausible (Pagan et al.,  
870 2013), but would benefit from further experimental exploration.

871 It may seem possible that adding more layers to the network would be a way  
872 to get the model to match the data without the need to introduce learning. This,  
873 however, is unlikely. For one, the data has high levels of pure selectivity which would  
874 be difficult to maintain through layers of random connections. Mixed selectivity, too,  
875 could decrease with layers, especially if each layer is noisy (which would be the realistic  
876 way to build such a model). It is also not obvious how such a model would achieve  
877 the clustering values observed in the data. Preliminary work on multi-layer models  
878 supports these intuitions (not shown). Also, such a model would not be able to address  
879 the changes with training discussed above. Finally, such a model would necessarily  
880 contain more parameters than a single layered network, and that would need to be  
881 taken into account when comparing to our learning model, which only introduces two  
882 additional parameters ( $N_L$  and the amount of learning, defined by the combination of  
883 learning rate and number of steps).

884 Another valuable endeavor would be to expand this model in the temporal domain.  
885 Currently in the model, all the task variable inputs are given to the network simulta-  
886 neously. In the experiment, of course, there is a delay between cue 1 and cue 2. Delay  
887 activity is known to exist in areas like IT (Woloszyn and Sheinberg, 2009; Fuster and  
888 Jervey, 1982), and so this information could be being feed into PFC at the same time.  
889 But presumably, recurrent connections in PFC, and even possibly between PFC and  
890 its input areas, can enhance or alter selectivity. A recurrent model could also explore  
891 how PFC responses and representation vary over the time course of the trial, as recent  
892 experimental work has provided insight on this (Murray et al., 2016). Interestingly,  
893 recent work has demonstrated that Hebbian learning can be used to train recurrent  
894 neural networks on context dependent tasks (Miconi, 2017).

## 895 5. Acknowledgements

896 GWL was supported by a Google PhD Fellowship and NIH (T32 NS064929). SF  
897 was supported by the Gatsby Charitable Foundation, the Simons Foundation, the  
898 Kavli Foundation and the Grossman Foundation. EKM was supported by NIMH

899 (NIMH R37MH087027) and MIT Picower Institute Innovation Fund. Thanks to Brian  
900 Lau for supplying code that implements the tests of uniformity on the hypersphere.  
901 The authors declare no competing financial interests.

## 902 6. References

903 Baktash Babadi and Haim Sompolinsky. Sparseness and expansion in sensory repre-  
904 sentations. *Neuron*, 83(5):1213–1226, 2014.

905 Omri Barak, Mattia Rigotti, and Stefano Fusi. The sparseness of mixed selectivity  
906 neurons controls the generalization–discrimination trade-off. *The Journal of Neuro-*  
907 *science*, 33(9):3844–3856, 2013.

908 Boris Barbour, Nicolas Brunel, Vincent Hakim, and Jean-Pierre Nadal. What can  
909 we learn from synaptic weight distributions? *TRENDS in Neurosciences*, 30(12):  
910 622–629, 2007.

911 Matthew M Botvinick. Hierarchical models of behavior and prefrontal function. *Trends*  
912 *in cognitive sciences*, 12(5):201–208, 2008.

913 Jennifer N Bourne and Kristen M Harris. Coordination of size and number of excitatory  
914 and inhibitory synapses results in a balanced structural plasticity along mature  
915 hippocampal ca1 dendrites during ltp. *Hippocampus*, 21(4):354–373, 2011.

916 Lior Bugatus, Kevin S Weiner, and Kalanit Grill-Spector. Task alters category repre-  
917 sentations in prefrontal but not high-level visual cortex. *NeuroImage*, 2017.

918 Dean V Buonomano and Wolfgang Maass. State-dependent computations: spatiotem-  
919 poral processing in cortical networks. *Nature Reviews Neuroscience*, 10(2):113–125,  
920 2009.

921 Marina Chistiakova and Maxim Volgushev. Heterosynaptic plasticity in the neocortex.  
922 *Experimental brain research*, 199(3):377–390, 2009.

923 Jean-René Duhamel, Carol L Colby, and Michael E Goldberg. Ventral intraparietal  
924 area of the macaque: congruent visual and somatic response properties. *Journal of*  
925 *neurophysiology*, 79(1):126–136, 1998.

926 John Duncan. An adaptive coding model of neural function in prefrontal cortex. *Nature*  
927 *Reviews Neuroscience*, 2(11):820–829, 2001.

928 Howard Eichenbaum, Andrew P Yonelinas, and Charan Ranganath. The medial tem-  
929 poral lobe and recognition memory. *Annu. Rev. Neurosci.*, 30:123–152, 2007.

930 Stefano Fusi, Earl K Miller, and Mattia Rigotti. Why neurons mix: high dimensionality  
931 for higher cognition. *Current opinion in neurobiology*, 37:66–74, 2016.

932 Joaquin M Fuster and John P Jervey. Neuronal firing in the inferotemporal cortex of  
933 the monkey in a visual memory task. *Journal of Neuroscience*, 2(3):361–375, 1982.

934 Evarist Giné. Invariant tests for uniformity on compact riemannian manifolds based  
935 on sobolev norms. *The Annals of statistics*, pages 1243–1266, 1975.

- 936 Paul W Glimcher. Understanding dopamine and reinforcement learning: the dopamine  
937 reward prediction error hypothesis. *Proceedings of the National Academy of Sciences*,  
938 108(Supplement 3):15647–15654, 2011.
- 939 Michael J Goard, Gerald N Pho, Jonathan Woodson, and Mriganka Sur. Distinct  
940 roles of visual, parietal, and frontal motor cortices in memory-guided sensorimotor  
941 decisions. *Elife*, 5:e13764, 2016.
- 942 Herbert Jaeger and Harald Haas. Harnessing nonlinearity: Predicting chaotic systems  
943 and saving energy in wireless communication. *science*, 304(5667):78–80, 2004.
- 944 Ned H Kalin, Steven E Shelton, and Lorey K Takahashi. Defensive behaviors in  
945 infant rhesus monkeys: ontogeny and context-dependent selective expression. *Child*  
946 *development*, 62(5):1175–1183, 1991.
- 947 Tara Keck, Taro Toyozumi, Lu Chen, Brent Doiron, Daniel E Feldman, Kevin Fox,  
948 Wulfram Gerstner, Philip G Haydon, Mark Hübener, Hey-Kyoung Lee, et al. Inte-  
949 grating hebbian and homeostatic plasticity: the current state of the field and future  
950 research directions. *Phil. Trans. R. Soc. B*, 372(1715):20160158, 2017.
- 951 Robert W Komorowski, Joseph R Manns, and Howard Eichenbaum. Robust conjunc-  
952 tive item–place coding by hippocampal neurons parallels learning what happens  
953 where. *Journal of Neuroscience*, 29(31):9918–9929, 2009.
- 954 Robert W Komorowski, Carolyn G Garcia, Alix Wilson, Shoai Hattori, Marc W  
955 Howard, and Howard Eichenbaum. Ventral hippocampal neurons are shaped by  
956 experience to represent behaviorally relevant contexts. *Journal of Neuroscience*, 33  
957 (18):8079–8087, 2013.
- 958 Ashok Litwin-Kumar, Kameron Decker Harris, Richard Axel, Haim Sompolinsky, and  
959 LF Abbott. Optimal degrees of synaptic connectivity. *Neuron*, 2017.
- 960 Yi-Jiuan Lo and Mu-ming Poo. Activity-dependent synaptic competition in vitro:  
961 heterosynaptic suppression of developing synapses. *Science*, 254(5034):1019, 1991.
- 962 Yonatan Loewenstein, Annerose Kuras, and Simon Rumpel. Multiplicative dynamics  
963 underlie the emergence of the log-normal distribution of spine sizes in the neocortex  
964 in vivo. *Journal of Neuroscience*, 31(26):9481–9488, 2011.
- 965 Wolfgang Maass, Thomas Natschläger, and Henry Markram. Real-time computing  
966 without stable states: A new framework for neural computation based on perturba-  
967 tions. *Neural computation*, 14(11):2531–2560, 2002.
- 968 Valerio Mante, David Sussillo, Krishna V Shenoy, and William T Newsome. Context-  
969 dependent computation by recurrent dynamics in prefrontal cortex. *Nature*, 503  
970 (7474):78–84, 2013.
- 971 Kanti V Mardia and Peter E Jupp. Distributions on spheres. *Directional Statistics*,  
972 pages 159–192, 2000.
- 973 Miriam LR Meister, Jay A Hennig, and Alexander C Huk. Signal multiplexing and  
974 single-neuron computations in lateral intraparietal area during decision-making.  
975 *Journal of Neuroscience*, 33(6):2254–2267, 2013.

- 976 Travis Meyer, Xue-Lian Qi, Terrence R Stanford, and Christos Constantinidis. Stim-  
977 ulus selectivity in dorsal and ventral prefrontal cortex after training in working  
978 memory tasks. *Journal of Neuroscience*, 31(17):6266–6276, 2011.
- 979 Ethan M Meyers, Xue-Lian Qi, and Christos Constantinidis. Incorporation of new  
980 information into prefrontal cortical activity after learning working memory tasks.  
981 *Proceedings of the National Academy of Sciences*, 109(12):4651–4656, 2012.
- 982 Thomas Miconi. Biologically plausible learning in recurrent neural networks reproduces  
983 neural dynamics observed during cognitive tasks. *eLife*, 6:e20899, 2017.
- 984 Brian T Miller and Mark D’Esposito. Searching for the top in top-down control.  
985 *Neuron*, 48(4):535–538, 2005.
- 986 Earl K Miller and Jonathan D Cohen. An integrative theory of prefrontal cortex  
987 function. *Annual review of neuroscience*, 24(1):167–202, 2001.
- 988 Edvard I Moser, Emilio Kropff, and May-Britt Moser. Place cells, grid cells, and the  
989 brain’s spatial representation system. *Annu. Rev. Neurosci.*, 31:69–89, 2008.
- 990 John D Murray, Alberto Bernacchia, Nicholas A Roy, Christos Constantinidis, Ranulfo  
991 Romo, and Xiao-Jing Wang. Stable population coding for working memory coexists  
992 with heterogeneous neural dynamics in prefrontal cortex. *Proceedings of the National  
993 Academy of Sciences*, page 201619449, 2016.
- 994 Marino Pagan, Luke S Urban, Margot P Wohl, and Nicole C Rust. Signals in infer-  
995 otemporal and perirhinal cortex suggest an untangling of visual target information.  
996 *Nature neuroscience*, 16(8):1132–1139, 2013.
- 997 Anitha Pasupathy and Earl K Miller. Different time courses of learning-related activity  
998 in the prefrontal cortex and striatum. *Nature*, 433(7028):873–876, 2005.
- 999 Xue-Lian Qi and Christos Constantinidis. Variability of prefrontal neuronal discharges  
1000 before and after training in a working memory task. *PLoS One*, 7(7):e41053, 2012.
- 1001 David Raposo, Matthew T Kaufman, and Anne K Churchland. A category-free neu-  
1002 ral population supports evolving demands during decision-making. *Nature neuro-  
1003 science*, 17(12):1784–1792, 2014.
- 1004 Drew Rendall, Robert M Seyfarth, Dorothy L Cheney, and Michael J Owren. The  
1005 meaning and function of grunt variants in baboons. *Animal Behaviour*, 57(3):583–  
1006 592, 1999.
- 1007 Mattia Rigotti, Daniel D Ben Dayan Rubin, Xiao-Jing Wang, and Stefano Fusi. In-  
1008 ternal representation of task rules by recurrent dynamics: the importance of the  
1009 diversity of neural responses. *Frontiers in computational neuroscience*, 4:24, 2010.
- 1010 Mattia Rigotti, Omri Barak, Melissa R Warden, Xiao-Jing Wang, Nathaniel D Daw,  
1011 Earl K Miller, and Stefano Fusi. The importance of mixed selectivity in complex  
1012 cognitive tasks. *Nature*, 497(7451):585–590, 2013.
- 1013 Maneesh Sahani and Jennifer F Linden. How linear are auditory cortical responses?  
1014 *Advances in neural information processing systems*, pages 125–132, 2003.



- 1015 Massimo Scanziani, Robert C Malenka, and Roger A Nicoll. Role of intercellular  
1016 interactions in heterosynaptic long-term depression. *Nature*, 380(6573):446, 1996.
- 1017 Mark G Stokes, Makoto Kusunoki, Natasha Sigala, Hamed Nili, David Gaffan, and  
1018 John Duncan. Dynamic coding for cognitive control in prefrontal cortex. *Neuron*,  
1019 78(2):364–375, 2013.
- 1020 Sara M Szczepanski and Robert T Knight. Insights into human behavior from lesions  
1021 to the prefrontal cortex. *Neuron*, 83(5):1002–1018, 2014.
- 1022 Gina G Turrigiano, Kenneth R Leslie, Niraj S Desai, Lana C Rutherford, and Sacha B  
1023 Nelson. Activity-dependent scaling of quantal amplitude in neocortical neurons.  
1024 *Nature*, 391(6670):892–896, 1998.
- 1025 Melissa R Warden and Earl K Miller. Task-dependent changes in short-term memory  
1026 in the prefrontal cortex. *The Journal of Neuroscience*, 30(47):15801–15810, 2010.
- 1027 Michael L Waskom, Dharshan Kumaran, Alan M Gordon, Jesse Rissman, and An-  
1028 thony D Wagner. Frontoparietal representations of task context support the flexible  
1029 control of goal-directed cognition. *The Journal of Neuroscience*, 34(32):10743–10755,  
1030 2014.
- 1031 Luke Woloszyn and David L Sheinberg. Neural dynamics in inferior temporal cortex  
1032 during a visual working memory task. *Journal of Neuroscience*, 29(17):5494–5507,  
1033 2009.
- 1034 Jacqueline N Wood and Jordan Grafman. Human prefrontal cortex: processing and  
1035 representational perspectives. *Nature Reviews Neuroscience*, 4(2):139–147, 2003.
